# Supplementary material for: Endothelial-derived cardiovascular disease-related microRNAs elevated with prolonged sitting pattern among postmenopausal women
Source: PubMed Central journal article supplement (PMC8175392; doi:10.1038/s41598-021-90154-1), 2021-06-03
Supplement: 41598_2021_90154_MOESM1_ESM.pdf [file 41598_2021_90154_MOESM1_ESM.pdf]

## SUPPLEMENTAL INFORMATION

### **Endothelial-derived cardiovascular disease-related microRNAs elevated with prolonged sitting pattern among postmenopausal women**

Ya-Ju Chang, PhD<sup>1</sup>; Fatima Tuz-Zahra, MS<sup>2</sup>; Suneeta Godbole, MPH, MS<sup>1</sup>; Yesenia Avitia, BS<sup>1</sup>; John Bellettiere, MA, MPH, PhD<sup>2,3</sup>; Cheryl L. Rock, PhD, RD<sup>1,4</sup>; Marta M. Jankowska, PhD<sup>5</sup>; Matthew A. Allison, MD, PhD<sup>1</sup>; David W Dunstan, PhD<sup>6,7</sup>; Brinda Rana, PhD<sup>4,8</sup>; Loki Natarajan, PhD<sup>2,4</sup>; and Dorothy D. Sears, PhD<sup>1,4,9,10</sup>

1 – Department of Family Medicine, UC San Diego, La Jolla, CA, USA

2 – Herbert Wertheim School of Public Health, UC San Diego, La Jolla CA, USA

3 – Center for Behavioral Epidemiology and Community Health, San Diego State University, San Diego, CA, USA

4 – Moores Cancer Center, UC San Diego, La Jolla CA, USA

5 - Beckman Research Institute, City of Hope, Duarte USA

6 – Baker Heart and Diabetes Institute, Melbourne, Australia

7 – Mary MacKillop Institute for Health Research, Australian Catholic University, Melbourne, Victoria, Australia

8 – Department of Psychiatry, UC San Diego, La Jolla CA, USA

9 – Department of Medicine, UC San Diego, La Jolla, CA, USA

10 – College of Health Solutions, Arizona State University, Phoenix, AZ, USA

## Supplementary Tables

Table S1. Identification of Interrupted Sitters (IS) and Super Sitters (SS) based on quartiles of mean sitting bout duration and moderate-to-vigorous physical activity (MVPA)

| MVPA<br>(min/day) | Mean sitting bout duration (min/day) |           |           |                 |
|-------------------|--------------------------------------|-----------|-----------|-----------------|
|                   | <29.8                                | 29.8-36.4 | 36.5-43.7 | >43.7           |
| <7.0              | 18 <sup>*</sup>                      | 19        | 37        | 53 <sup>†</sup> |
| 7.0-15.5          | 20                                   | 35        | 39        | 35              |
| 15.6-29.4         | 47                                   | 33        | 27        | 23              |
| >29.4             | 43                                   | 42        | 26        | 18              |

<sup>\*</sup>IS, interrupted sitters; <sup>†</sup>SS, super sitters

Table S2. List of 84 miRs in Human Cardiovascular disease miScript miRNA PCR array

|             |             |             |            |             |             |
|-------------|-------------|-------------|------------|-------------|-------------|
| let-7a-5p   | let-7b-5p   | let-7c      | let-7d-5p  | let-7e-5p   | let-7f-5p   |
| miR-1       | miR-100-5p  | miR-103a-3p | miR-107    | miR-10b-5p  | miR-122-5p  |
| miR-124-3p  | miR-125a-5p | miR-125b-5p | miR-126-3p | miR-130a-3p | miR-133a    |
| miR-133b    | miR-140-5p  | miR-142-3p  | miR-143-3p | miR-144-3p  | miR-145-5p  |
| miR-146a-5p | miR-149-5p  | miR-150-5p  | miR-155-5p | miR-15b-5p  | miR-16-5p   |
| miR-17-5p   | miR-181a-5p | miR-181b-5p | miR-182-5p | miR-183-5p  | miR-185-5p  |
| miR-18b-5p  | miR-195-5p  | miR-199a-5p | miR-206    | miR-208a    | miR-208b    |
| miR-21-5p   | miR-210     | miR-214-3p  | miR-22-3p  | miR-221-3p  | miR-222-3p  |
| miR-223-3p  | miR-224-5p  | miR-23a-3p  | miR-23b-3p | miR-24-3p   | miR-25-3p   |
| miR-26a-5p  | miR-26b-5p  | miR-27a-3p  | miR-27b-3p | miR-29a-3p  | miR-29b-3p  |
| miR-29c-3p  | miR-302a-3p | miR-302b-3p | miR-30a-5p | miR-30c-5p  | miR-30d-5p  |
| miR-30e-5p  | miR-31-5p   | miR-320a    | miR-328    | miR-342-3p  | miR-365a-3p |
| miR-378a-3p | miR-423-3p  | miR-424-5p  | miR-451a   | miR-486-5p  | miR-494     |
| miR-499a-5p | miR-7-5p    | miR-92a-3p  | miR-93-5p  | miR-98-5p   | miR-99a-5p  |

Table S3. MiRs from the CVD array analysis (N=74) not included in the Top 10 ranking of miRs differentially expressed between IS and SS (Table 2).

|             | Mean Difference in<br>Relative Expr | Relative Expr,<br>SD | Standardized ATE<br>Rank | standardized<br>ATE | SD<br>Rank |
|-------------|-------------------------------------|----------------------|--------------------------|---------------------|------------|
| miR-221-3p  | 9.04                                | 5.46                 | 11                       | 4.16                | 56         |
| miR-125b-5p | 2.06                                | 1.26                 | 12                       | 4.11                | 23         |
| miR-224-5p  | 1.97                                | 1.00                 | 13                       | 4.11                | 19         |
| miR-22-3p   | 4.84                                | 2.25                 | 14                       | 4.09                | 41         |
| miR-93-5p   | 5.93                                | 2.11                 | 15                       | 4.01                | 37         |
| miR-7-5p    | 3.85                                | 2.02                 | 16                       | 3.99                | 35         |
| miR-214-3p  | 5.54                                | 2.30                 | 17                       | 3.99                | 43         |
| miR-149-5p  | 2.07                                | 1.27                 | 18                       | 3.93                | 24         |
| miR-100-5p  | 1.26                                | 0.71                 | 19                       | 3.93                | 12         |
| miR-210     | 6.21                                | 3.07                 | 20                       | 3.89                | 47         |
| miR-10b-5p  | 3.77                                | 2.16                 | 21                       | 3.86                | 38         |
| miR-1       | 0.44                                | 0.35                 | 22                       | 3.85                | 7          |
| miR-107     | 1.30                                | 0.72                 | 23                       | 3.85                | 13         |
| miR-181a-5p | 1.88                                | 0.89                 | 24                       | 3.79                | 16         |
| miR-29c-3p  | 3.35                                | 1.64                 | 25                       | 3.71                | 29         |
| miR-133a    | 1.49                                | 1.17                 | 26                       | 3.64                | 21         |
| miR-18b-5p  | 2.22                                | 0.97                 | 27                       | 3.62                | 18         |
| miR-499a-5p | 0.11                                | 0.10                 | 28                       | 3.58                | 1          |
| miR-423-3p  | 13.14                               | 6.69                 | 29                       | 3.57                | 62         |
| miR-26b-5p  | 4.85                                | 2.63                 | 30                       | 3.57                | 44         |
| miR-124-3p  | 8.71                                | 4.30                 | 31                       | 3.50                | 50         |
| miR-16-5p   | 33.14                               | 14.37                | 32                       | 3.45                | 77         |
| miR-208a    | 1.13                                | 0.50                 | 33                       | 3.45                | 9          |
| let-7c      | 18.01                               | 6.18                 | 34                       | 3.42                | 60         |
| miR-30a-5p  | 4.17                                | 1.51                 | 35                       | 3.34                | 26         |
| miR-30d-5p  | 4.31                                | 1.94                 | 36                       | 3.32                | 31         |
| miR-26a-5p  | 40.54                               | 18.24                | 37                       | 3.30                | 80         |
| miR-144-3p  | 3.03                                | 1.57                 | 38                       | 3.29                | 28         |
| miR-31-5p   | 7.85                                | 3.21                 | 39                       | 3.21                | 48         |
| miR-99a-5p  | 0.68                                | 0.44                 | 40                       | 3.19                | 8          |
| miR-25-3p   | 28.93                               | 9.92                 | 41                       | 3.13                | 69         |
| miR-451a    | 9.37                                | 7.30                 | 42                       | 2.93                | 65         |
| miR-30e-5p  | 2.77                                | 1.17                 | 43                       | 2.91                | 22         |
| miR-92a-3p  | 94.44                               | 25.34                | 44                       | 2.86                | 83         |
| miR-302a-3p | 9.38                                | 4.63                 | 45                       | 2.84                | 52         |
| miR-328     | 21.42                               | 10.53                | 46                       | 2.75                | 71         |
| miR-30c-5p  | 28.86                               | 10.08                | 47                       | 2.68                | 70         |
| miR-27a-3p  | 25.35                               | 9.26                 | 48                       | 2.64                | 67         |

|             |       |       |    |      |    |
|-------------|-------|-------|----|------|----|
| miR-183-5p  | 4.60  | 3.35  | 49 | 2.61 | 49 |
| miR-126-3p  | 22.88 | 9.54  | 50 | 2.58 | 68 |
| miR-98-5p   | 0.65  | 0.33  | 51 | 2.57 | 6  |
| miR-208b    | 1.73  | 0.76  | 52 | 2.57 | 14 |
| miR-365a-3p | 0.30  | 0.18  | 53 | 2.55 | 3  |
| miR-185-5p  | 3.37  | 1.97  | 54 | 2.47 | 33 |
| miR-206     | 10.94 | 6.37  | 55 | 2.43 | 61 |
| miR-24-3p   | 2.15  | 2.06  | 56 | 2.42 | 36 |
| miR-122-5p  | 0.29  | 0.14  | 57 | 2.40 | 2  |
| miR-23b-3p  | 0.92  | 0.71  | 58 | 2.33 | 11 |
| miR-494     | 16.53 | 6.75  | 59 | 2.31 | 63 |
| let-7b-5p   | 25.47 | 11.95 | 60 | 2.31 | 73 |
| miR-15b-5p  | 2.85  | 2.66  | 61 | 2.31 | 45 |
| let-7f-5p   | 1.18  | 0.95  | 62 | 2.30 | 17 |
| miR-21-5p   | 8.04  | 7.30  | 63 | 2.28 | 66 |
| miR-130-3p  | 32.62 | 12.03 | 64 | 2.26 | 74 |
| miR-27b-3p  | 4.70  | 2.16  | 65 | 2.21 | 39 |
| miR-195-5p  | 31.29 | 11.05 | 66 | 2.13 | 72 |
| miR-320a    | 74.51 | 33.29 | 67 | 2.12 | 84 |
| miR-223-3p  | 23.16 | 25.18 | 68 | 2.11 | 82 |
| miR-29b-3p  | 5.38  | 2.69  | 69 | 2.10 | 46 |
| miR-29a-3p  | 11.51 | 4.82  | 70 | 1.98 | 53 |
| miR-17-5p   | 15.70 | 5.87  | 71 | 1.98 | 59 |
| miR-182-5p  | 22.11 | 12.76 | 72 | 1.97 | 76 |
| miR-302b-3p | 4.62  | 1.75  | 73 | 1.88 | 30 |
| let-7a-5p   | 0.84  | 1.12  | 74 | 1.84 | 20 |
| miR-486-5p  | 68.52 | 18.75 | 75 | 1.84 | 81 |
| miR-222-3p  | 16.40 | 7.24  | 76 | 1.68 | 64 |
| miR-378a-3p | 13.36 | 5.34  | 77 | 1.66 | 55 |
| miR-150-5p  | 14.19 | 5.50  | 78 | 1.61 | 57 |
| miR-342-3p  | 58.65 | 17.14 | 79 | 1.60 | 79 |
| miR-143-3p  | 5.88  | 1.98  | 80 | 1.40 | 34 |
| miR-125a-5p | 16.62 | 5.85  | 81 | 1.37 | 58 |
| miR-23a-3p  | 3.66  | 4.48  | 82 | 1.35 | 51 |
| miR-145-5p  | 44.65 | 12.27 | 83 | 1.28 | 75 |
| miR-181b-5p | 37.27 | 15.11 | 84 | 0.49 | 78 |

List was sorted by standardized ATE and SD of miR levels from IS and SS groups. ATE, average treatment effect: weighted mean difference of miR levels between SS and IS; Standardized ATE, ATE divided by bootstrapped SD of ATE. SD, standard deviation; Expr: expression.

Table S4. Identification of Interrupted Sitter (IS+) and Super Sitter (SS+) groups with augmented representation of Hispanic ethnicity.

| MVPA<br>(min/day) | Mean Sitting bout duration (min/day) |           |           |                   |
|-------------------|--------------------------------------|-----------|-----------|-------------------|
|                   | <29.8                                | 29.8-36.4 | 36.5-43.7 | >43.7             |
| <7.0              | 18*                                  | 19        | 37        | 53 <sup>†</sup>   |
| 7.0-15.5          | 13+7*                                | 35        | 39        | 28+7 <sup>†</sup> |
| 15.6-29.4         | 47                                   | 33        | 27        | 23                |
| >29.4             | 43                                   | 42        | 26        | 18                |

All women who self-identified as Hispanic and who were in the 2<sup>nd</sup>-lowest quartile of MVPA and 1st and 4th quartiles of mean sitting bout duration (N=7 each) were included to create the amended groups IS+ (n=25) and SS+ (n=60), respectively, with augmented representation of Hispanic ethnicity in the groups.

\*IS+, Interrupted Sitters with augmented diversity in Hispanic ethnicity.

<sup>†</sup>SS+, Super Sitters with augmented diversity in Hispanic ethnicity.

Table S5. Age and Activity-Related Characteristics of IS+ and SS+ Groups

|                                        | Total (n=85)  | IS+ (n=25)  | SS+ (n=60)   | P-value |
|----------------------------------------|---------------|-------------|--------------|---------|
| Age, mean (sd)                         | 65.7 (6.4)    | 63.7 (4.7)  | 66.5 (6.8)   | 0.06    |
| Activity-related measures, mean (sd)   |               |             |              |         |
| Total sitting time; min/day            | 594.0 (122.7) | 440.3(69.9) | 658.1 (72.5) | <0.01*  |
| Mean sitting bout duration; min/day    | 52.0 (26.0)   | 25.9 (2.8)  | 62.8 (23.4)  | <0.01*  |
| Moderate-to-vigorous activity; min/day | 4.8 (3.4)     | 6.5 (3.8)   | 4.1 (3.0)    | <0.01*  |
| Walking time; min/day                  | 34.9 (29.1)   | 56.3 (36.9) | 26.0 (19.3)  | <0.01*  |

P-values computed using t-tests

\*P<0.05

Table S6. Correlation analysis among 3 targeted microRNAs

|                                     |                     | Let-7d-5p | miR-133b | miR-142-3p |
|-------------------------------------|---------------------|-----------|----------|------------|
| Let-7d-5p                           | Pearson Correlation | 1         | 0.16     | 0.426*     |
|                                     | <i>P</i> -value     |           | 0.145    | 0.01       |
| miR-133b                            | Pearson Correlation | 0.16      | 1        | 0.16       |
|                                     | <i>P</i> -value     | 0.145     |          | 0.143      |
| miR-142-3p                          | Pearson Correlation | 0.426*    | 0.16     | 1          |
|                                     | <i>P</i> -value     | 0.01      | 0.143    |            |
| *Significant correlation (2-tailed) |                     |           |          |            |



Table S7. Functional pathway analysis of literature-based miR target genes (continuation of Table 4)

| KEGG Pathway**                                    | Proteoglycans in cancer | Endocytosis   | Protein processing in endoplasmic reticulum | Chronic myeloid leukemia | Hepatitis B   | Bacterial invasion of epithelial cells | Thyroid hormone signaling pathway |
|---------------------------------------------------|-------------------------|---------------|---------------------------------------------|--------------------------|---------------|----------------------------------------|-----------------------------------|
| P-value                                           | 2.30E-04                | 3.42E-03      | 6.42E-03                                    | 7.74E-03                 | 1.86E-02      | 2.16E-02                               | 2.24E-02                          |
| MicroRNAs associated with prolonged sitting       | let-7d-5p<br>miR-142-3p | let-7d-5p     | let-7d-5p<br>miR-142-3p                     | miR-142-3p<br>let-7d-5p  | let-7d-5p     | miR-142-3p                             | let-7d-5p                         |
| Literature-supported target genes (direct target) | <i>ACTB</i>             | <i>CCR5</i>   | <i>ATF6B</i>                                | <i>AKT2</i>              | <i>APAF1</i>  | <i>CLTA</i>                            | <i>ACTB</i>                       |
|                                                   | <i>ACTG1</i>            | <i>CLTA</i>   | <i>CAPN1</i>                                | <i>BRAF</i>              | <i>ATF6B</i>  | <i>CRK</i>                             | <i>ACTG1</i>                      |
|                                                   | <i>ARHGEF1</i>          | <i>CXCR4</i>  | <i>ERO1L</i>                                | <i>CCND1</i>             | <i>CASP3</i>  | <i>CTNNB1</i>                          | <i>CCND1</i>                      |
|                                                   | <i>BRAF</i>             | <i>HSPA8</i>  | <i>HSPA8</i>                                | <i>CDK4</i>              | <i>CCNA2</i>  | <i>PIK3CD</i>                          | <i>CREBBP</i>                     |
|                                                   | <i>CASP3</i>            | <i>IGF1R</i>  | <i>HSP90AA1</i>                             | <i>CDKN1A</i>            | <i>CCND1</i>  | <i>PIK3R2</i>                          | <i>ESR1</i>                       |
|                                                   | <i>CCND1</i>            | <i>PARD6B</i> | <i>MAN1A1</i>                               | <i>CRK</i>               | <i>CCNE2</i>  | <i>PIK3R5</i>                          | <i>HIF1A</i>                      |
|                                                   | <i>CDKN1A</i>           | <i>SMAD2</i>  | <i>MAPK8</i>                                | <i>E2F2</i>              | <i>CDK4</i>   | <i>RAC1</i>                            | <i>ITGAV</i>                      |
|                                                   | <i>ESR1</i>             | <i>SMAD3</i>  | <i>MOGS</i>                                 | <i>E2F3</i>              | <i>CDKN1A</i> |                                        | <i>MAPK1</i>                      |
|                                                   | <i>FZD1</i>             | <i>SMAD7</i>  | <i>RPN2</i>                                 | <i>MAPK1</i>             | <i>CREBBP</i> |                                        | <i>MDM2</i>                       |
|                                                   | <i>FZD3</i>             | <i>TGFBR1</i> | <i>STT3B</i>                                | <i>MYC</i>               | <i>DDX3X</i>  |                                        | <i>MTOR</i>                       |
|                                                   | <i>HIF1A</i>            | <i>TGFBR2</i> |                                             | <i>NRAS</i>              | <i>DDB1</i>   |                                        | <i>MYC</i>                        |
|                                                   | <i>IGF1R</i>            |               |                                             | <i>PIK3CD</i>            | <i>E2F2</i>   |                                        | <i>NRAS</i>                       |
|                                                   | <i>ITGAV</i>            |               |                                             | <i>PIK3R2</i>            | <i>E2F3</i>   |                                        | <i>PLCG1</i>                      |
|                                                   | <i>MTOR</i>             |               |                                             | <i>PIK3R5</i>            | <i>FADD</i>   |                                        | <i>PRKACA</i>                     |
|                                                   | <i>MYC</i>              |               |                                             | <i>RUNX1</i>             | <i>MAPK1</i>  |                                        | <i>TP53</i>                       |
|                                                   | <i>NRAS</i>             |               |                                             | <i>SMAD3</i>             | <i>MAPK8</i>  |                                        |                                   |
|                                                   | <i>PLCG1</i>            |               |                                             | <i>SMAD4</i>             | <i>MYC</i>    |                                        |                                   |
|                                                   | <i>PRKACA</i>           |               |                                             | <i>TGFBR1†</i>           | <i>NRAS</i>   |                                        |                                   |
|                                                   | <i>PTPN6</i>            |               |                                             | <i>TGFBR2</i>            | <i>TGFBR1</i> |                                        |                                   |
|                                                   | <i>RAC1</i>             |               |                                             | <i>TP53</i>              | <i>TLR4</i>   |                                        |                                   |
|                                                   | <i>RPS6KB2</i>          |               |                                             | <i>TGFBR2</i>            | <i>TP53</i>   |                                        |                                   |
|                                                   | <i>SMAD2</i>            |               |                                             |                          | <i>SMAD3</i>  |                                        |                                   |
|                                                   | <i>TLR4</i>             |               |                                             |                          | <i>JAK1</i>   |                                        |                                   |
|                                                   | <i>TP53</i>             |               |                                             |                          |               |                                        |                                   |

|                                                       |                 |                |                 |               |               |               |                 |
|-------------------------------------------------------|-----------------|----------------|-----------------|---------------|---------------|---------------|-----------------|
| Literature-supported target genes (non-direct target) | <i>CTSL</i>     | <i>ADRB2</i>   | <i>CKAP4</i>    | <i>CDKN1B</i> | <i>MAP2K4</i> | <i>ARPC1B</i> | <i>ATP1A1</i>   |
|                                                       | <i>FGFR1</i>    | <i>AGAP3</i>   | <i>DERL1</i>    | <i>MDM2†</i>  | <i>MAP3K1</i> | <i>CTTN</i>   | <i>MED13L</i>   |
|                                                       | <i>FLNC</i>     | <i>AP2A1</i>   | <i>DNAJA1</i>   | <i>PTPN11</i> | <i>PCNA</i>   | <i>GAB1</i>   | <i>MED13</i>    |
|                                                       | <i>FZD7</i>     | <i>AP2B1</i>   | <i>DNAJA2</i>   |               |               | <i>HCLS1</i>  | <i>NCOA3</i>    |
|                                                       | <i>IGF2</i>     | <i>ARF1</i>    | <i>DNAJB1</i>   |               |               | <i>WASL</i>   | <i>PFKP</i>     |
|                                                       | <i>ITPR3</i>    | <i>ARF3</i>    | <i>DNAJB11</i>  |               |               |               | <i>SLC16A10</i> |
|                                                       | <i>MAPK1</i>    | <i>ARF6</i>    | <i>EDEM2</i>    |               |               |               | <i>THRA</i>     |
|                                                       | <i>MDM2†</i>    | <i>ASAP1</i>   | <i>EDEM3</i>    |               |               |               |                 |
|                                                       | <i>MSN</i>      | <i>EEA1</i>    | <i>EIF2AK2</i>  |               |               |               |                 |
|                                                       | <i>PPP1CA</i>   | <i>EHD4</i>    | <i>EIF2S1</i>   |               |               |               |                 |
|                                                       | <i>PPP1R12A</i> | <i>EPN2</i>    | <i>ERP29</i>    |               |               |               |                 |
|                                                       | <i>RDX</i>      | <i>LDLR</i>    | <i>HERPUD1</i>  |               |               |               |                 |
|                                                       | <i>SDC4</i>     | <i>MDM2</i>    | <i>LMAN1</i>    |               |               |               |                 |
|                                                       | <i>TFAP4</i>    | <i>NEDD4</i>   | <i>MAN1A2</i>   |               |               |               |                 |
|                                                       | <i>TWIST2</i>   | <i>NEDD4L</i>  | <i>MAP2K7</i>   |               |               |               |                 |
|                                                       | <i>VAV2</i>     | <i>PIP5K1C</i> | <i>MBTPS1</i>   |               |               |               |                 |
|                                                       | <i>WNT9A</i>    | <i>RAB11A</i>  | <i>NPLOC4</i>   |               |               |               |                 |
|                                                       |                 | <i>RAB22A</i>  | <i>PPP1R15A</i> |               |               |               |                 |
|                                                       |                 | <i>RAB5B</i>   | <i>RPN1</i>     |               |               |               |                 |
|                                                       |                 | <i>RAB5C</i>   | <i>SEC24B</i>   |               |               |               |                 |
|                                                       |                 | <i>SNF8</i>    | <i>SEC24C</i>   |               |               |               |                 |
|                                                       |                 | <i>TSG101</i>  | <i>SSR1</i>     |               |               |               |                 |
|                                                       |                 | <i>VPS25</i>   | <i>SVIP</i>     |               |               |               |                 |
|                                                       |                 | <i>VPS37C</i>  | <i>TRAM1</i>    |               |               |               |                 |
|                                                       |                 | <i>ZFYVE20</i> | <i>UBE2D4</i>   |               |               |               |                 |
|                                                       |                 |                | <i>UBE2J1</i>   |               |               |               |                 |
|                                                       |                 |                | <i>UBE4B</i>    |               |               |               |                 |
|                                                       |                 |                | <i>XBP1</i>     |               |               |               |                 |
|                                                       |                 |                | <i>YOD1</i>     |               |               |               |                 |
|                                                       |                 |                | <i>LMAN1</i>    |               |               |               |                 |

\*\*KEGG pathway analysis based on Tarbase v7.0

†Target genes for 2 miRs

Table S8. Functional pathway analysis of literature-based miR target genes (continuation of Table VII)

| KEGG Pathway**                                                              | Apoptosis                                                                                                          | Pancreatic cancer                                                                                                             | Colorectal cancer                                                                                                                                                                                        | Estrogen signaling pathway                                                                                   | Prostate cancer                                                                                                                                                                                                                                         | N-Glycan biosynthesis                                                                                                                                                                     |
|-----------------------------------------------------------------------------|--------------------------------------------------------------------------------------------------------------------|-------------------------------------------------------------------------------------------------------------------------------|----------------------------------------------------------------------------------------------------------------------------------------------------------------------------------------------------------|--------------------------------------------------------------------------------------------------------------|---------------------------------------------------------------------------------------------------------------------------------------------------------------------------------------------------------------------------------------------------------|-------------------------------------------------------------------------------------------------------------------------------------------------------------------------------------------|
| <i>P</i> -value                                                             | 2.27E-02                                                                                                           | 2.61E-02                                                                                                                      | 3.28E-02                                                                                                                                                                                                 | 3.36E-02                                                                                                     | 4.65E-02                                                                                                                                                                                                                                                | 4.79E-02                                                                                                                                                                                  |
| MicroRNAs associated with prolonged sitting                                 | let-7d-5p                                                                                                          | miR-142-3p                                                                                                                    | let-7d-5p                                                                                                                                                                                                | miR-142-3p                                                                                                   | let-7d-5p                                                                                                                                                                                                                                               | let-7d-5p                                                                                                                                                                                 |
| Literature-supported target genes (direct target)                           | <i>APAF1</i><br><i>BIRC2</i><br><i>CAPN1</i><br><i>CASP3</i><br><i>FADD</i><br><i>PRKACA</i><br><i>TP53</i>        | <i>AKT2</i><br><i>E2F2</i><br><i>PIK3R2</i><br><i>PIK3R5</i><br><i>PIK3CD</i><br><i>RAC1</i><br><i>SMAD4</i><br><i>TGFBR1</i> | <i>BRAF</i><br><i>CASP3</i><br><i>CCND1</i><br><i>MAPK1</i><br><i>MAPK8</i><br><i>MSH6</i><br><i>MYC</i><br><i>RAC1</i><br><i>SMAD2</i><br><i>SMAD3</i><br><i>TGFBR1</i><br><i>TGFBR2</i><br><i>TP53</i> | <i>AKT2</i><br><i>PIK3CD</i><br><i>PIK3R2</i><br><i>PIK3R5</i>                                               | <i>AR</i><br><i>BRAF</i><br><i>CCND1</i><br><i>CCNE2</i><br><i>CDKN1A</i><br><i>CREBBP</i><br><i>E2F2</i><br><i>E2F3</i><br><i>FGFR1</i><br><i>HSP90AA1</i><br><i>IGF1R</i><br><i>MAPK1</i><br><i>MDM2</i><br><i>MTOR</i><br><i>NRAS</i><br><i>TP53</i> | <i>ALG3</i><br><i>ALG8</i><br><i>DOLK</i><br><i>DPM2</i><br><i>MAN1A1</i><br><i>MGAT1</i><br><i>MGAT4A</i><br><i>MOGS</i><br><i>RPN1</i><br><i>RPN2</i><br><i>STT3B</i><br><i>ST6GAL1</i> |
| Literature-supported target genes (non-direct target)                       | <i>BIRC3</i><br><i>DFFA</i><br><i>IL1R1</i><br><i>PRKAR1B</i><br><i>PRKAR2A</i><br><i>TNFRSF10B</i><br><i>XIAP</i> |                                                                                                                               |                                                                                                                                                                                                          | <i>ATF2</i><br><i>CREB3L2</i><br><i>CREB5</i><br><i>GNAQ</i><br><i>GNAS</i><br><i>HSPA1B</i><br><i>PRKCD</i> | <i>PDGFB</i>                                                                                                                                                                                                                                            |                                                                                                                                                                                           |
| **KEGG pathway analysis based on Tarbase v7.0.<br>†Target genes for 2 miRs. |                                                                                                                    |                                                                                                                               |                                                                                                                                                                                                          |                                                                                                              |                                                                                                                                                                                                                                                         |                                                                                                                                                                                           |

Table S9. Primer assays for 5 selected miRs and control panels used for validation studies

| miScript Primer Assay | Targets mature miRs | Target organism | Vendor | Catalog#   |
|-----------------------|---------------------|-----------------|--------|------------|
| Hs_miR-199a_1         | miR-199a-5p         | Homo sapiens    | Qiagen | MS00006741 |
| Hs_le7d_1             | let-7d-5p           | Homo sapiens    | Qiagen | MS00003136 |
| Hs_miR-140_1          | miR-140-5p          | Homo sapiens    | Qiagen | MS00003500 |
| Hs_miR-142-3p_2       | miR-142-3p          | Homo sapiens    | Qiagen | MS00031451 |
| Hs_miR-133b_2         | miR-133b            | Homo sapiens    | Qiagen | MS00031430 |
| Hs_SNORD61_11         | SNORD61 small RNA   | Homo sapiens    | Qiagen | MS00033705 |
| Cel-miR-39_1          | cel-miR-39-3p       | C-elegans       | Qiagen | MS00019789 |

Table S10. Target genes of the 3 miRs

| <b>let-7d-5p</b>   | <b>miR-133b</b>   | <b>miR-142-3p</b> |
|--------------------|-------------------|-------------------|
| <i>A1CF</i>        | <i>AAK1</i>       | <i>ABCA9</i>      |
| <i>AAK1</i>        | <i>ABCC1</i>      | <i>ABCD3</i>      |
| <i>AASS</i>        | <i>ABCD2</i>      | <i>ABI2</i>       |
| <i>ABCB9</i>       | <i>ABCG4</i>      | <i>ABL2</i>       |
| <i>ABCC10</i>      | <i>ABL2</i>       | <i>AC012123.1</i> |
| <i>ABCC5</i>       | <i>ACAT2</i>      | <i>ACBD5</i>      |
| <i>ABHD17C</i>     | <i>ACTR1A</i>     | <i>ACVR2A</i>     |
| <i>ABL2</i>        | <i>ADAMTS5</i>    | <i>ADAMTS3</i>    |
| <i>AC008443.1</i>  | <i>ADARB2</i>     | <i>ADCY9</i>      |
| <i>AC010441.1</i>  | <i>ADCY5</i>      | <i>AFF1</i>       |
| <i>AC023632.1</i>  | <i>ADCY6</i>      | <i>AFF2</i>       |
| <i>AC068987.1</i>  | <i>ADCYAP1</i>    | <i>AKIRIN2</i>    |
| <i>AC140061.12</i> | <i>ADRA2B</i>     | <i>AKT1S1</i>     |
| <i>ACAP3</i>       | <i>AFAP1</i>      | <i>ANK3</i>       |
| <i>ACER2</i>       | <i>AFTPH</i>      | <i>ANKFY1</i>     |
| <i>ACER3</i>       | <i>AGRP</i>       | <i>ANKRD11</i>    |
| <i>ACPP</i>        | <i>AIF1L</i>      | <i>ANKRD33B</i>   |
| <i>ACSL6</i>       | <i>AK2</i>        | <i>ANKRD40</i>    |
| <i>ACVR1B</i>      | <i>AKAP9</i>      | <i>ANKS1A</i>     |
| <i>ACVR1C</i>      | <i>AL117190.3</i> | <i>AP5M1</i>      |
| <i>ACVR2A</i>      | <i>ALDH5A1</i>    | <i>APC</i>        |
| <i>ACVR2B</i>      | <i>AMD1</i>       | <i>ARHGAP12</i>   |
| <i>ADAM15</i>      | <i>ANAPC1</i>     | <i>ARHGEF12</i>   |
| <i>ADAMTS1</i>     | <i>ANK2</i>       | <i>ARHGEF2</i>    |
| <i>ADAMTS14</i>    | <i>ANKRD12</i>    | <i>ARID5B</i>     |
| <i>ADAMTS15</i>    | <i>ANKRD28</i>    | <i>ARL1</i>       |
| <i>ADAMTS5</i>     | <i>ANKRD44</i>    | <i>ARL15</i>      |
| <i>ADAMTS8</i>     | <i>ANKRD46</i>    | <i>ARNTL</i>      |
| <i>ADCY9</i>       | <i>ANKRD52</i>    | <i>ARRDC3</i>     |
| <i>ADIPOR2</i>     | <i>AOX1</i>       | <i>ASAP2</i>      |
| <i>ADRB1</i>       | <i>AP1AR</i>      | <i>ASB7</i>       |
| <i>ADRB2</i>       | <i>AP1B1</i>      | <i>ASH1L</i>      |
| <i>ADRB3</i>       | <i>AP2M1</i>      | <i>ATF7IP</i>     |
| <i>ADRBK2</i>      | <i>AP4E1</i>      | <i>ATG16L1</i>    |
| <i>AEN</i>         | <i>AQP1</i>       | <i>ATP1B1</i>     |
| <i>AFF2</i>        | <i>ARFIP2</i>     | <i>ATP2A2</i>     |
| <i>AGAP1</i>       | <i>ARHGAP12</i>   | <i>ATXN1L</i>     |
| <i>AGO1</i>        | <i>ARHGAP24</i>   | <i>ATXN2</i>      |
| <i>AGO3</i>        | <i>ARHGAP39</i>   | <i>ATXN7</i>      |
| <i>AGO4</i>        | <i>ARHGAP9</i>    | <i>BACH1</i>      |
| <i>AGPAT6</i>      | <i>ARHGDIA</i>    | <i>BACH2</i>      |
| <i>AGPAT9</i>      | <i>ARL3</i>       | <i>BAZ1A</i>      |
| <i>AHCTF1</i>      | <i>ARNTL2</i>     | <i>BCL2L1</i>     |
| <i>AIFM1</i>       | <i>ARPC5</i>      | <i>BCLAF1</i>     |
| <i>AKAP5</i>       | <i>ARRB1</i>      | <i>BIRC3</i>      |
| <i>AKAP6</i>       | <i>ARX</i>        | <i>BNC2</i>       |
| <i>AKT2</i>        | <i>ASB1</i>       | <i>BOD1</i>       |

|          |           |             |
|----------|-----------|-------------|
| ALDH6A1  | ASH1L     | BRWD3       |
| ALKBH1   | ATOX1     | BTBD7       |
| ALPK3    | ATP2A2    | BTLA        |
| AMER3    | ATP6AP2   | C16orf70    |
| AMMECR1L | ATRX      | C18orf25    |
| AMOT     | B3GALNT1  | C20orf112   |
| AMT      | B3GNT2    | C20orf194   |
| ANGPTL2  | B3GNT9    | C4orf32     |
| ANKFY1   | BAMBI     | C5orf24     |
| ANKRD28  | BAZ2A     | C6orf47     |
| ANKRD33B | BCL2L1    | C9orf72     |
| ANKRD46  | BCL2L2    | CA5B        |
| ANKRD52  | BCORL1    | CASK        |
| AP1S1    | BHLHE41   | CASZ1       |
| APBA1    | BICC1     | CCDC6       |
| APBB3    | BNC2      | CCNJ        |
| APC2     | BNIP3L    | CCNT2       |
| APPBP2   | BTBD10    | CD84        |
| ARG2     | BTBD3     | CDC14A      |
| ARHGAP20 | C11orf58  | CELF2       |
| ARHGAP28 | C12orf43  | CFL2        |
| ARHGEF15 | C17orf96  | CHMP3       |
| ARHGEF38 | C1QL1     | CHRNE       |
| ARHGEF7  | C20orf194 | CHURC1-FNTB |
| ARID3A   | C2orf69   | CIITA       |
| ARID3B   | CACNA1B   | CLCN5       |
| ARL4D    | CACUL1    | CLIC4       |
| ARL5A    | CALM1     | CLOCK       |
| ARL5B    | CAMK1D    | CLTA        |
| ARL6IP6  | CAP1      | CNIH4       |
| ARMC8    | CAPN15    | COG4        |
| ARPP19   | CAPN5     | COL24A1     |
| ARRDC4   | CASC3     | COPG1       |
| ASAP1    | CCDC117   | COPS7A      |
| ATAD2B   | CCDC144A  | CPEB2       |
| ATG16L1  | CCDC176   | CRK         |
| ATG4B    | CCDC30    | CRTAM       |
| ATP2A2   | CCNDBP1   | CTNND1      |
| ATP2B3   | CCNT1     | CTTN        |
| ATP2B4   | CD47      | CXADR       |
| ATP6V1C1 | CDCA8     | CYSLTR2     |
| ATP8B4   | CDIP1     | DCUN1D4     |
| ATPAF1   | CDK13     | DHX30       |
| ATXN1L   | CDK5R1    | DIDO1       |
| ATXN7L3  | CDK8      | DIRC2       |
| ATXN7L3B | CDYL2     | DYNC1LI2    |
| B3GALT1  | CECR6     | EDEM3       |
| B3GAT1   | CELF1     | EHF         |
| B3GAT3   | CELF5     | EML4        |

|                  |                |                   |
|------------------|----------------|-------------------|
| <i>B3GNT1</i>    | <i>CELF6</i>   | <i>EPN1</i>       |
| <i>B3GNT7</i>    | <i>CEP128</i>  | <i>ERC1</i>       |
| <i>BACE2</i>     | <i>CEP85L</i>  | <i>ERG</i>        |
| <i>BACH1</i>     | <i>CERS2</i>   | <i>FAM114A1</i>   |
| <i>BAHD1</i>     | <i>CETN3</i>   | <i>FAM127A</i>    |
| <i>BBX</i>       | <i>CGGBP1</i>  | <i>FAM127B</i>    |
| <i>BCAP29</i>    | <i>CHD2</i>    | <i>FAM208B</i>    |
| <i>BCAT1</i>     | <i>CHD3</i>    | <i>FAM73A</i>     |
| <i>BCL2L1</i>    | <i>CHRM3</i>   | <i>FBXO21</i>     |
| <i>BCL7A</i>     | <i>CKAP4</i>   | <i>FBXO3</i>      |
| <i>BDP1</i>      | <i>CLCN6</i>   | <i>FBXO45</i>     |
| <i>BEGAIN</i>    | <i>CLTA</i>    | <i>FKBP1A</i>     |
| <i>BEND4</i>     | <i>CMPK1</i>   | <i>FLVCR1</i>     |
| <i>BIN3</i>      | <i>CMTM6</i>   | <i>FMNL2</i>      |
| <i>BLOC1S5</i>   | <i>CNKSR2</i>  | <i>FNBP1L</i>     |
| <i>BLOC1S6</i>   | <i>CNN2</i>    | <i>FNDC3A</i>     |
| <i>BMP2</i>      | <i>CNNM2</i>   | <i>FNTB</i>       |
| <i>BMP5</i>      | <i>CNNM4</i>   | <i>FOXO1</i>      |
| <i>BMPR1A</i>    | <i>CNOT1</i>   | <i>FOXO4</i>      |
| <i>BNC2</i>      | <i>CNTNAP1</i> | <i>GAB1</i>       |
| <i>BRWD3</i>     | <i>COL1A1</i>  | <i>GFI1</i>       |
| <i>BSN</i>       | <i>COL25A1</i> | <i>GHR</i>        |
| <i>BSND</i>      | <i>COL8A1</i>  | <i>GNAQ</i>       |
| <i>BTBD3</i>     | <i>CORO1C</i>  | <i>GNAS</i>       |
| <i>BTBD9</i>     | <i>CPLX2</i>   | <i>GNB2</i>       |
| <i>BTF3L4</i>    | <i>CPNE3</i>   | <i>GOLGA1</i>     |
| <i>BTG2</i>      | <i>CREB5</i>   | <i>GPCPD1</i>     |
| <i>BZW1</i>      | <i>CRK</i>     | <i>GPR137C</i>    |
| <i>BZW2</i>      | <i>CRTAM</i>   | <i>GPRIN3</i>     |
| <i>C11orf57</i>  | <i>CSNK1G3</i> | <i>GTF2A1</i>     |
| <i>C11orf84</i>  | <i>CSRNP1</i>  | <i>HAVCR1</i>     |
| <i>C14orf28</i>  | <i>CSTF2</i>   | <i>HEATR5A</i>    |
| <i>C15orf39</i>  | <i>CTBP2</i>   | <i>HECTD1</i>     |
| <i>C15orf41</i>  | <i>CTGF</i>    | <i>HHIP</i>       |
| <i>C16orf52</i>  | <i>CTSV</i>    | <i>HIPK1</i>      |
| <i>C17orf85</i>  | <i>CUL4B</i>   | <i>HMGA1</i>      |
| <i>C19orf26</i>  | <i>CUX2</i>    | <i>HMGA2</i>      |
| <i>C19orf47</i>  | <i>CYLD</i>    | <i>HMGB1</i>      |
| <i>C1GALT1</i>   | <i>DAPK2</i>   | <i>HNRNPC</i>     |
| <i>C1orf147</i>  | <i>DBNL</i>    | <i>HSPE1-MOB4</i> |
| <i>C20orf112</i> | <i>DCBLD1</i>  | <i>IER3</i>       |
| <i>C20orf194</i> | <i>DCLRE1A</i> | <i>IL1RAPL1</i>   |
| <i>C2orf88</i>   | <i>DCP1A</i>   | <i>IL6ST</i>      |
| <i>C3orf52</i>   | <i>DCUN1D4</i> | <i>IL7R</i>       |
| <i>C5orf51</i>   | <i>DDX19B</i>  | <i>INHBA</i>      |
| <i>C6orf203</i>  | <i>DDX3X</i>   | <i>INPP5A</i>     |
| <i>C6orf211</i>  | <i>DDX3Y</i>   | <i>IPMK</i>       |
| <i>C8orf58</i>   | <i>DESI1</i>   | <i>IPO7</i>       |
| <i>C9orf40</i>   | <i>DIAPH2</i>  | <i>IRAK1</i>      |

|                 |                 |                      |
|-----------------|-----------------|----------------------|
| <i>C9orf41</i>  | <i>DLG2</i>     | <i>ITGA8</i>         |
| <i>CACFD1</i>   | <i>DLGAP3</i>   | <i>ITGAV</i>         |
| <i>CACNA1E</i>  | <i>DMXL1</i>    | <i>ITGB8</i>         |
| <i>CACNA1I</i>  | <i>DNAJB1</i>   | <i>ITPKB</i>         |
| <i>CACNB4</i>   | <i>DNAJC3</i>   | <i>ITPR3</i>         |
| <i>CACNG4</i>   | <i>DOLPP1</i>   | <i>JMJD1C</i>        |
| <i>CADM2</i>    | <i>DOT1L</i>    | <i>JMJD7-PLA2G4B</i> |
| <i>CALM1</i>    | <i>DSN1</i>     | <i>KAT2B</i>         |
| <i>CALN1</i>    | <i>DSTYK</i>    | <i>KAT7</i>          |
| <i>CALU</i>     | <i>DUSP1</i>    | <i>KCNJ6</i>         |
| <i>CANT1</i>    | <i>DUSP7</i>    | <i>KCNS2</i>         |
| <i>CAPN3</i>    | <i>DYNC1LI2</i> | <i>KDELR2</i>        |
| <i>CASK</i>     | <i>E2F7</i>     | <i>KDM6A</i>         |
| <i>CASKIN1</i>  | <i>EDEM1</i>    | <i>KIF5B</i>         |
| <i>CASP3</i>    | <i>EEF1A1</i>   | <i>KLF13</i>         |
| <i>CASP5</i>    | <i>EFNA4</i>    | <i>KMT2A</i>         |
| <i>CBFA2T3</i>  | <i>EGFR</i>     | <i>LCOR</i>          |
| <i>CBL</i>      | <i>EIF3J</i>    | <i>LLGL2</i>         |
| <i>CBX2</i>     | <i>EIF4A1</i>   | <i>LMO3</i>          |
| <i>CBX5</i>     | <i>ELAVL1</i>   | <i>LPP</i>           |
| <i>CCDC141</i>  | <i>ELF2</i>     | <i>LRP1B</i>         |
| <i>CCDC144A</i> | <i>ELF3</i>     | <i>LRRC1</i>         |
| <i>CCDC71L</i>  | <i>ELFN1</i>    | <i>LRRC17</i>        |
| <i>CCDC93</i>   | <i>ELMO1</i>    | <i>LRRC32</i>        |
| <i>CCL3</i>     | <i>ELP5</i>     | <i>LRRC59</i>        |
| <i>CCL3L1</i>   | <i>EMP2</i>     | <i>MANBAL</i>        |
| <i>CCL3L3</i>   | <i>ENC1</i>     | <i>MAP2</i>          |
| <i>CCL7</i>     | <i>ENPEP</i>    | <i>MAP2K6</i>        |
| <i>CCND1</i>    | <i>ENPP5</i>    | <i>MAP3K11</i>       |
| <i>CCND2</i>    | <i>ENPP6</i>    | <i>MAP4K3</i>        |
| <i>CCNF</i>     | <i>ENTPD7</i>   | <i>MARCH1</i>        |
| <i>CCNJ</i>     | <i>EPHA7</i>    | <i>MARCKS</i>        |
| <i>CCNJL</i>    | <i>EPHB4</i>    | <i>MARK3</i>         |
| <i>CCNT2</i>    | <i>EPS15</i>    | <i>MBD6</i>          |
| <i>CCNY</i>     | <i>ERMP1</i>    | <i>MEF2C</i>         |
| <i>CCR7</i>     | <i>ESRRG</i>    | <i>MEIS1</i>         |
| <i>CCSAP</i>    | <i>ESYT1</i>    | <i>MGAT4A</i>        |
| <i>CD200R1</i>  | <i>ESYT2</i>    | <i>MLXIP</i>         |
| <i>CD86</i>     | <i>ETF1</i>     | <i>MMGT1</i>         |
| <i>CDC25A</i>   | <i>EXD2</i>     | <i>MOB4</i>          |
| <i>CDC34</i>    | <i>EYA1</i>     | <i>MOCS1</i>         |
| <i>CDC42SE1</i> | <i>EYA4</i>     | <i>MORF4L1</i>       |
| <i>CDC48</i>    | <i>FAF2</i>     | <i>MORF4L2</i>       |
| <i>CDH22</i>    | <i>FAM102B</i>  | <i>MRFAP1</i>        |
| <i>CDK14</i>    | <i>FAM117B</i>  | <i>MSI2</i>          |
| <i>CDK6</i>     | <i>FAM13A</i>   | <i>MTCH1</i>         |
| <i>CDK8</i>     | <i>FAM160B1</i> | <i>MTMR9</i>         |
| <i>CDKN1A</i>   | <i>FAM193B</i>  | <i>MYH10</i>         |
| <i>CDV3</i>     | <i>FAM199X</i>  | <i>MYH9</i>          |



|                 |                  |                 |
|-----------------|------------------|-----------------|
| <i>CDYL</i>     | <i>FAM19A5</i>   | <i>MYLK</i>     |
| <i>CEBPD</i>    | <i>FAM208A</i>   | <i>MYO5A</i>    |
| <i>CECR2</i>    | <i>FAM43B</i>    | <i>NCK2</i>     |
| <i>CECR6</i>    | <i>FAM46A</i>    | <i>NDC1</i>     |
| <i>CELF1</i>    | <i>FAM46C</i>    | <i>NFIB</i>     |
| <i>CEP135</i>   | <i>FAM49A</i>    | <i>NHSL1</i>    |
| <i>CEP164</i>   | <i>FAM57A</i>    | <i>NKX2-3</i>   |
| <i>CEP85L</i>   | <i>FAM73A</i>    | <i>NOL7</i>     |
| <i>CERCAM</i>   | <i>FARP1</i>     | <i>NR1D2</i>    |
| <i>CFL2</i>     | <i>FBN1</i>      | <i>NR2F6</i>    |
| <i>CGNL1</i>    | <i>FBN2</i>      | <i>NR3C1</i>    |
| <i>CHD4</i>     | <i>FBXL19</i>    | <i>NSF</i>      |
| <i>CHD7</i>     | <i>FBXL2</i>     | <i>NSUN3</i>    |
| <i>CHD9</i>     | <i>FBXW11</i>    | <i>NUCKS1</i>   |
| <i>CHIC1</i>    | <i>FGF1</i>      | <i>P2RY1</i>    |
| <i>CHRD</i>     | <i>FGFR1</i>     | <i>PAFAH1B2</i> |
| <i>CHRFAM7A</i> | <i>FLVCR1</i>    | <i>PAN3</i>     |
| <i>CHRNA7</i>   | <i>FOSL2</i>     | <i>PAPD7</i>    |
| <i>CHST3</i>    | <i>FOXC1</i>     | <i>PARD6B</i>   |
| <i>CHSY3</i>    | <i>FOXG1</i>     | <i>PARP8</i>    |
| <i>CHUK</i>     | <i>FOXK2</i>     | <i>PATZ1</i>    |
| <i>CLASP2</i>   | <i>FOXL2</i>     | <i>PCGF3</i>    |
| <i>CLCN5</i>    | <i>FOXN3</i>     | <i>PDE4B</i>    |
| <i>CLDN12</i>   | <i>FOXP1</i>     | <i>PDE8A</i>    |
| <i>CLOCK</i>    | <i>FOXP2</i>     | <i>PGRMC2</i>   |
| <i>CLP1</i>     | <i>FOXP4</i>     | <i>PHF12</i>    |
| <i>CLPB</i>     | <i>FOXQ1</i>     | <i>PICALM</i>   |
| <i>CMTM6</i>    | <i>FRS2</i>      | <i>PIK3CG</i>   |
| <i>CNNM2</i>    | <i>FSCN1</i>     | <i>PIK3R6</i>   |
| <i>CNOT2</i>    | <i>FST</i>       | <i>PLCB1</i>    |
| <i>CNOT6L</i>   | <i>FTL</i>       | <i>PLEKHA3</i>  |
| <i>CNTRL</i>    | <i>FURIN</i>     | <i>PMAIP1</i>   |
| <i>COIL</i>     | <i>GABARAPL1</i> | <i>POMGNT1</i>  |
| <i>COL11A1</i>  | <i>GABBR2</i>    | <i>PPP1R10</i>  |
| <i>COL14A1</i>  | <i>GABPB2</i>    | <i>PPP1R15B</i> |
| <i>COL15A1</i>  | <i>GABRB1</i>    | <i>PPP1R37</i>  |
| <i>COL1A1</i>   | <i>GALNT16</i>   | <i>PPP3CA</i>   |
| <i>COL1A2</i>   | <i>GARNL3</i>    | <i>PPP3R1</i>   |
| <i>COL24A1</i>  | <i>GBA2</i>      | <i>PRLR</i>     |
| <i>COL27A1</i>  | <i>GCH1</i>      | <i>PROM1</i>    |
| <i>COL3A1</i>   | <i>GCLC</i>      | <i>PROX1</i>    |
| <i>COL4A1</i>   | <i>GDF11</i>     | <i>PRRG1</i>    |
| <i>COL4A2</i>   | <i>GDI1</i>      | <i>PSMB5</i>    |
| <i>COL4A3BP</i> | <i>GDI2</i>      | <i>PSMD11</i>   |
| <i>COL4A5</i>   | <i>GDNF</i>      | <i>PTBP3</i>    |
| <i>COL4A6</i>   | <i>GID8</i>      | <i>PTPN23</i>   |
| <i>COL5A2</i>   | <i>GIGYF1</i>    | <i>PUM1</i>     |
| <i>COL9A1</i>   | <i>GLRA2</i>     | <i>PURB</i>     |
| <i>COL9A3</i>   | <i>GMEB1</i>     | <i>QKI</i>      |

|                   |                 |                     |
|-------------------|-----------------|---------------------|
| <i>CPA4</i>       | <i>GNB4</i>     | <i>RAB11A</i>       |
| <i>CPD</i>        | <i>GPM6A</i>    | <i>RAB11FIP2</i>    |
| <i>CPEB1</i>      | <i>GPR173</i>   | <i>RAB12</i>        |
| <i>CPEB2</i>      | <i>GRIA2</i>    | <i>RAB1A</i>        |
| <i>CPEB3</i>      | <i>GRID2</i>    | <i>RAB2A</i>        |
| <i>CPEB4</i>      | <i>GRM5</i>     | <i>RAB3A</i>        |
| <i>CPED1</i>      | <i>GRM7</i>     | <i>RAB3D</i>        |
| <i>CPM</i>        | <i>GXYLT1</i>   | <i>RAB40C</i>       |
| <i>CPSF4</i>      | <i>GZF1</i>     | <i>RAC1</i>         |
| <i>CRB2</i>       | <i>HAPLN1</i>   | <i>RAP1GAP2</i>     |
| <i>CRBN</i>       | <i>HECW1</i>    | <i>RARG</i>         |
| <i>CRCT1</i>      | <i>HHIP</i>     | <i>RASSF3</i>       |
| <i>CRK</i>        | <i>HIC2</i>     | <i>RBFOX2</i>       |
| <i>CRTAP</i>      | <i>HIVEP2</i>   | <i>RBM27</i>        |
| <i>CRY2</i>       | <i>HLF</i>      | <i>RBM47</i>        |
| <i>CSNK2A1</i>    | <i>HLTF</i>     | <i>RBMS1</i>        |
| <i>CSRNP3</i>     | <i>HMGXB3</i>   | <i>RERE</i>         |
| <i>CTB-5409.9</i> | <i>HOXA9</i>    | <i>RFWD3</i>        |
| <i>CTDSPL2</i>    | <i>HOXB5</i>    | <i>RGL2</i>         |
| <i>CTIF</i>       | <i>HOXD1</i>    | <i>RHEB</i>         |
| <i>CTNS</i>       | <i>HS2ST1</i>   | <i>RHOBTB3</i>      |
| <i>CTPS1</i>      | <i>HS3ST5</i>   | <i>RICTOR</i>       |
| <i>CXorf36</i>    | <i>HSPA13</i>   | <i>RIMKLB</i>       |
| <i>CYB561D1</i>   | <i>HSPA4L</i>   | <i>RLF</i>          |
| <i>CYP19A1</i>    | <i>ICK</i>      | <i>RNF103-CHMP3</i> |
| <i>CYP46A1</i>    | <i>ID4</i>      | <i>RNF157</i>       |
| <i>CYTH3</i>      | <i>IDH1</i>     | <i>RNF24</i>        |
| <i>DAB1</i>       | <i>IFIT2</i>    | <i>RNF38</i>        |
| <i>DAGLA</i>      | <i>IGF1R</i>    | <i>ROCK2</i>        |
| <i>DAPK1</i>      | <i>IL6ST</i>    | <i>RPRD1A</i>       |
| <i>DARS2</i>      | <i>IMPG1</i>    | <i>RREB1</i>        |
| <i>DCAF15</i>     | <i>INSR</i>     | <i>RSF1</i>         |
| <i>DCAF8</i>      | <i>IQGAP2</i>   | <i>S1PR3</i>        |
| <i>DCUN1D2</i>    | <i>ISCA2</i>    | <i>SEC22A</i>       |
| <i>DCUN1D3</i>    | <i>ITPRIPL2</i> | <i>SEMA5B</i>       |
| <i>DCX</i>        | <i>JAZF1</i>    | <i>SERAC1</i>       |
| <i>DDI2</i>       | <i>JDP2</i>     | <i>SERP1</i>        |
| <i>DDN</i>        | <i>KCNA6</i>    | <i>SETD1B</i>       |
| <i>DDX19A</i>     | <i>KCND3</i>    | <i>SGK1</i>         |
| <i>DDX19B</i>     | <i>KCNJ12</i>   | <i>SH2B1</i>        |
| <i>DDX26B</i>     | <i>KCNK7</i>    | <i>SH3GLB1</i>      |
| <i>DENND6A</i>    | <i>KCTD15</i>   | <i>SIK1</i>         |
| <i>DHX57</i>      | <i>KCTD16</i>   | <i>SIK2</i>         |
| <i>DIAPH2</i>     | <i>KCTD20</i>   | <i>SKP1</i>         |
| <i>DICER1</i>     | <i>KDM2A</i>    | <i>SLC17A5</i>      |
| <i>DKK3</i>       | <i>KIAA0141</i> | <i>SLC1A3</i>       |
| <i>DLC1</i>       | <i>KIAA0232</i> | <i>SLC25A22</i>     |
| <i>DLGAP4</i>     | <i>KIAA0430</i> | <i>SLC35A1</i>      |
| <i>DLST</i>       | <i>KIAA1024</i> | <i>SLC35F5</i>      |

|          |          |          |
|----------|----------|----------|
| DMD      | KIAA1045 | SLC37A3  |
| DMP1     | KIAA1239 | SLC38A4  |
| DNA2     | KIAA1429 | SLC6A11  |
| DNAH10OS | KIAA1432 | SLC7A11  |
| DNAJA2   | KIAA1522 | SLCO4C1  |
| DNAJB14  | KIAA1549 | SMG1     |
| DNAJB9   | KIF21A   | SMUG1    |
| DNAJC1   | KIF3C    | SNX18    |
| DNAJC10  | KIRREL   | SOCS6    |
| DNAL1    | KLF7     | SOX11    |
| DOCK3    | KLHDC10  | SOX5     |
| DPF2     | KLHL11   | SP4      |
| DPH1     | KLHL2    | SP8      |
| DPH3     | KLHL42   | SPNS1    |
| DPP3     | KLHL9    | SPRED1   |
| DPYSL3   | KMT2C    | SS18     |
| DSG3     | KPNA6    | STAM     |
| DST      | LAMB3    | STAM2    |
| DTX2     | LANCL2   | STAU1    |
| DTX4     | LASP1    | STRN3    |
| DUSP1    | LDLRAP1  | STX12    |
| DUSP16   | LDOC1    | STX7     |
| DUSP22   | LEPROTL1 | SUCO     |
| DUSP4    | LETMD1   | SYPL1    |
| DUSP7    | LGALS8   | TAB2     |
| DUSP9    | LHFP     | TAGAP    |
| DVL3     | LHX5     | TAOK1    |
| DYRK1A   | LHX9     | TARDBP   |
| DYRK2    | LIN28B   | TBC1D2B  |
| DZIP1    | LIN7A    | TBL1X    |
| E2F2     | LIN7C    | TBL1XR1  |
| E2F5     | LOXL4    | TCEB3    |
| E2F6     | LPGAT1   | TEAD1    |
| EDA      | LPHN1    | TESK2    |
| EDEM3    | LPIN2    | TET3     |
| EDN1     | LRRC2    | TEX2     |
| EEA1     | LRRC7    | TFG      |
| EEF2K    | LTBP1    | TGFB2    |
| EFHD2    | LUZP1    | TGFBR1   |
| EGLN2    | LZTS2    | THSD4    |
| EGR3     | LZTS3    | TIPARP   |
| EIF2B2   | MAEA     | TIRAP    |
| EIF2S2   | MAFG     | TMED7    |
| EIF4G2   | MAML1    | TMEFF2   |
| EIF5B    | MAML3    | TMEM110  |
| ELF4     | MAN1A2   | TMEM115  |
| ELK4     | MAP3K2   | TMEM200B |
| ELOVL4   | MAP3K3   | TMEM55B  |
| EMB      | MAP7     | TMEM59   |

|                 |                 |                 |
|-----------------|-----------------|-----------------|
| <i>ENTPD7</i>   | <i>MCL1</i>     | <i>TNKS</i>     |
| <i>EOGT</i>     | <i>MECOM</i>    | <i>TNRC18</i>   |
| <i>EPHA3</i>    | <i>MECP2</i>    | <i>TP53INP2</i> |
| <i>EPHA4</i>    | <i>MED12L</i>   | <i>TPM4</i>     |
| <i>ERCC4</i>    | <i>MED8</i>     | <i>TSEN34</i>   |
| <i>ERCC6</i>    | <i>MEIS1</i>    | <i>TTBK2</i>    |
| <i>ERGIC1</i>   | <i>MEIS2</i>    | <i>TWF1</i>     |
| <i>ERGIC2</i>   | <i>METTL21B</i> | <i>TXLNA</i>    |
| <i>ERO1L</i>    | <i>MFSD6</i>    | <i>UNKL</i>     |
| <i>ERP29</i>    | <i>MID2</i>     | <i>USP6NL</i>   |
| <i>ESPL1</i>    | <i>MIER3</i>    | <i>UTRN</i>     |
| <i>ETNK1</i>    | <i>MKL2</i>     | <i>UTY</i>      |
| <i>ETNK2</i>    | <i>MLLT3</i>    | <i>VAMP3</i>    |
| <i>ETV3</i>     | <i>MLXIP</i>    | <i>VANGL1</i>   |
| <i>EXOC5</i>    | <i>MMGT1</i>    | <i>WASL</i>     |
| <i>EZH1</i>     | <i>MMP14</i>    | <i>WHSC1L1</i>  |
| <i>FADS3</i>    | <i>MMP15</i>    | <i>WIZ</i>      |
| <i>FAM103A1</i> | <i>MPPED1</i>   | <i>WNK3</i>     |
| <i>FAM104A</i>  | <i>MRC2</i>     | <i>XIAP</i>     |
| <i>FAM118A</i>  | <i>MRFAP1</i>   | <i>XPO1</i>     |
| <i>FAM135A</i>  | <i>MRGBP</i>    | <i>ZBTB10</i>   |
| <i>FAM155A</i>  | <i>MRPL44</i>   | <i>ZBTB20</i>   |
| <i>FAM160B2</i> | <i>MSN</i>      | <i>ZBTB41</i>   |
| <i>FAM178A</i>  | <i>MTMR4</i>    | <i>ZCCHC14</i>  |
| <i>FAM189A1</i> | <i>MTX3</i>     | <i>ZCCHC24</i>  |
| <i>FAM208A</i>  | <i>MYH9</i>     | <i>ZEB1</i>     |
| <i>FAM214B</i>  | <i>MYO9B</i>    | <i>ZEB2</i>     |
| <i>FAM222B</i>  | <i>MYRF</i>     | <i>ZFP36L2</i>  |
| <i>FAM43A</i>   | <i>NAA40</i>    | <i>ZFP91</i>    |
| <i>FAM83G</i>   | <i>NAGS</i>     | <i>ZFR</i>      |
| <i>FAM84B</i>   | <i>NCAM2</i>    | <i>ZMYND8</i>   |
| <i>FARP1</i>    | <i>NCAN</i>     | <i>ZNF217</i>   |
| <i>FAS</i>      | <i>NCKAP5L</i>  | <i>ZNF395</i>   |
| <i>FASLG</i>    | <i>NDRG1</i>    | <i>ZNF618</i>   |
| <i>FASTK</i>    | <i>NEBL</i>     | <i>ZNF644</i>   |
| <i>FAXC</i>     | <i>NELFA</i>    | <i>ZNF652</i>   |
| <i>FBXL19</i>   | <i>NELL2</i>    | <i>ZNF827</i>   |
| <i>FBXO21</i>   | <i>NFAT5</i>    | <i>ZNF831</i>   |
| <i>FBXO30</i>   | <i>NFIA</i>     | <i>ZZZ3</i>     |
| <i>FBXO32</i>   | <i>NFIB</i>     |                 |
| <i>FBXO45</i>   | <i>NFYA</i>     |                 |
| <i>FGD6</i>     | <i>NIPA1</i>    |                 |
| <i>FGF11</i>    | <i>NIPA2</i>    |                 |
| <i>FGF5</i>     | <i>NKD1</i>     |                 |
| <i>FIGN</i>     | <i>NLGN2</i>    |                 |
| <i>FKRP</i>     | <i>NMT1</i>     |                 |
| <i>FNDC3A</i>   | <i>NR6A1</i>    |                 |
| <i>FNDC3B</i>   | <i>NRG3</i>     |                 |
| <i>FNIP1</i>    | <i>NRIP3</i>    |                 |

|                |                |
|----------------|----------------|
| <i>FNIP2</i>   | <i>NTNG1</i>   |
| <i>FOPNL</i>   | <i>NUP153</i>  |
| <i>FOXP1</i>   | <i>NUP160</i>  |
| <i>FOXP2</i>   | <i>NUS1</i>    |
| <i>FRAS1</i>   | <i>ORAI2</i>   |
| <i>FREM2</i>   | <i>ORC4</i>    |
| <i>FRMD4B</i>  | <i>OTUD4</i>   |
| <i>FRMD5</i>   | <i>OTUD7B</i>  |
| <i>FRS2</i>    | <i>PAN3</i>    |
| <i>FSD2</i>    | <i>PANK3</i>   |
| <i>FSTL4</i>   | <i>PAOX</i>    |
| <i>FZD3</i>    | <i>PAPD5</i>   |
| <i>FZD4</i>    | <i>PARD6G</i>  |
| <i>G3BP1</i>   | <i>PARVA</i>   |
| <i>GAB2</i>    | <i>PAWR</i>    |
| <i>GABBR2</i>  | <i>PAX7</i>    |
| <i>GABPA</i>   | <i>PCDH1</i>   |
| <i>GABRA6</i>  | <i>PCDH17</i>  |
| <i>GABRB1</i>  | <i>PCSK5</i>   |
| <i>GALC</i>    | <i>PCSK6</i>   |
| <i>GALE</i>    | <i>PDE10A</i>  |
| <i>GALNT1</i>  | <i>PDE1C</i>   |
| <i>GALNT15</i> | <i>PDE7A</i>   |
| <i>GALNT2</i>  | <i>PDE8B</i>   |
| <i>GALNT4</i>  | <i>PDIK1L</i>  |
| <i>GAN</i>     | <i>PDK3</i>    |
| <i>GAREM</i>   | <i>PEAK1</i>   |
| <i>GAS7</i>    | <i>PEX5L</i>   |
| <i>GATM</i>    | <i>PFAS</i>    |
| <i>GCNT4</i>   | <i>PFKFB3</i>  |
| <i>GDAP2</i>   | <i>PFN2</i>    |
| <i>GDF6</i>    | <i>PHTF2</i>   |
| <i>GDPD1</i>   | <i>PIK3C2A</i> |
| <i>GEMIN7</i>  | <i>PIKFYVE</i> |
| <i>GHR</i>     | <i>PIP4K2B</i> |
| <i>GIPC1</i>   | <i>PITPNB</i>  |
| <i>GJA9</i>    | <i>PITPNM2</i> |
| <i>GJC1</i>    | <i>PITPNM3</i> |
| <i>GK5</i>     | <i>PKNOX1</i>  |
| <i>GLRX</i>    | <i>PLCL2</i>   |
| <i>GNAL</i>    | <i>PLEKHA3</i> |
| <i>GNG5</i>    | <i>PLEKHA8</i> |
| <i>GNPTAB</i>  | <i>PML</i>     |
| <i>GNS</i>     | <i>POLH</i>    |
| <i>GOLGA4</i>  | <i>POU4F1</i>  |
| <i>GOLGA7</i>  | <i>POU6F2</i>  |
| <i>GOLT1B</i>  | <i>PPFIA2</i>  |
| <i>GOPC</i>    | <i>PPFIA3</i>  |
| <i>GPATCH2</i> | <i>PPM1H</i>   |

|                |                     |
|----------------|---------------------|
| <i>GPATCH3</i> | <i>PPP1R9B</i>      |
| <i>GPC4</i>    | <i>PPP2CA</i>       |
| <i>GPCPD1</i>  | <i>PPP2CB</i>       |
| <i>GPR132</i>  | <i>PPP2R2D</i>      |
| <i>GPR137</i>  | <i>PPP2R4</i>       |
| <i>GPR137C</i> | <i>PPP2R5E</i>      |
| <i>GPR156</i>  | <i>PPP6R3</i>       |
| <i>GPR157</i>  | <i>PRDM1</i>        |
| <i>GPR26</i>   | <i>PRDM16</i>       |
| <i>GPR61</i>   | <i>PRDM6</i>        |
| <i>GPR63</i>   | <i>PREX1</i>        |
| <i>GRAMD1B</i> | <i>PRKAB1</i>       |
| <i>GREB1</i>   | <i>PRKCB</i>        |
| <i>GREB1L</i>  | <i>PRMT6</i>        |
| <i>GRID2IP</i> | <i>PROX1</i>        |
| <i>GRIK2</i>   | <i>PRPF38A</i>      |
| <i>GRIN2B</i>  | <i>PRRT2</i>        |
| <i>GRIN3A</i>  | <i>PSD3</i>         |
| <i>GRPEL2</i>  | <i>PSEN1</i>        |
| <i>GSG1L</i>   | <i>PTBP1</i>        |
| <i>GTF2I</i>   | <i>PTBP2</i>        |
| <i>GXYLT1</i>  | <i>PTBP3</i>        |
| <i>GYG2</i>    | <i>PTMA</i>         |
| <i>HABP4</i>   | <i>PTPN22</i>       |
| <i>HAND1</i>   | <i>PTPRD</i>        |
| <i>HAND2</i>   | <i>PTPRK</i>        |
| <i>HAS2</i>    | <i>PTPRT</i>        |
| <i>HBEGF</i>   | <i>PTPRZ1</i>       |
| <i>HCFC2</i>   | <i>PURB</i>         |
| <i>HDHD1</i>   | <i>PWWP2B</i>       |
| <i>HDLBP</i>   | <i>QKI</i>          |
| <i>HDX</i>     | <i>RAB11FIP4</i>    |
| <i>HECTD2</i>  | <i>RAB27B</i>       |
| <i>HECTD4</i>  | <i>RAB30</i>        |
| <i>HELZ</i>    | <i>RAB5C</i>        |
| <i>HIC1</i>    | <i>RAD51L3-RFFL</i> |
| <i>HIC2</i>    | <i>RAP2C</i>        |
| <i>HIF1AN</i>  | <i>RAPH1</i>        |
| <i>HIF3A</i>   | <i>RARB</i>         |
| <i>HIP1</i>    | <i>RAVER1</i>       |
| <i>HIPK2</i>   | <i>RB1CC1</i>       |
| <i>HK2</i>     | <i>RBM23</i>        |
| <i>HLF</i>     | <i>RBMS1</i>        |
| <i>HMGA1</i>   | <i>RBMX</i>         |
| <i>HMGA2</i>   | <i>RBMXL1</i>       |
| <i>HNRNPA1</i> | <i>RBPJ</i>         |
| <i>HOOK1</i>   | <i>RCE1</i>         |
| <i>HOXA1</i>   | <i>RFC1</i>         |
| <i>HOXA9</i>   | <i>RFFL</i>         |

|                   |                       |
|-------------------|-----------------------|
| <i>HOXB1</i>      | <i>RFX3</i>           |
| <i>HOXC11</i>     | <i>RFX6</i>           |
| <i>HOXD1</i>      | <i>RHOA</i>           |
| <i>HS2ST1</i>     | <i>RIMS1</i>          |
| <i>HSPE1-MOB4</i> | <i>RLN2</i>           |
| <i>HTR1E</i>      | <i>RP1-170O19.20</i>  |
| <i>HTR4</i>       | <i>RPAP2</i>          |
| <i>ICK</i>        | <i>RPL17-C18orf32</i> |
| <i>ICMT</i>       | <i>RRP15</i>          |
| <i>ICOS</i>       | <i>RTN4RL1</i>        |
| <i>IDH2</i>       | <i>RUNX1T1</i>        |
| <i>IGDCC3</i>     | <i>RWDD2A</i>         |
| <i>IGDCC4</i>     | <i>SACM1L</i>         |
| <i>IGF1</i>       | <i>SAMD5</i>          |
| <i>IGF1R</i>      | <i>SCN1A</i>          |
| <i>IGF2BP1</i>    | <i>SCN2B</i>          |
| <i>IGF2BP2</i>    | <i>SCOC</i>           |
| <i>IGF2BP3</i>    | <i>SDC2</i>           |
| <i>IGLON5</i>     | <i>SEC61B</i>         |
| <i>IGSF1</i>      | <i>SEPHS2</i>         |
| <i>IKBKAP</i>     | <i>SESN1</i>          |
| <i>IKBKE</i>      | <i>SESN3</i>          |
| <i>IKZF2</i>      | <i>SETD6</i>          |
| <i>IL10</i>       | <i>SF3B1</i>          |
| <i>IL13</i>       | <i>SF3B4</i>          |
| <i>IL6R</i>       | <i>SFMBT2</i>         |
| <i>IMPG2</i>      | <i>SFT2D3</i>         |
| <i>INO80D</i>     | <i>SFXN2</i>          |
| <i>INPP5A</i>     | <i>SFXN5</i>          |
| <i>INSR</i>       | <i>SGK1</i>           |
| <i>INTS2</i>      | <i>SGMS2</i>          |
| <i>INTU</i>       | <i>SGPP1</i>          |
| <i>IPO11</i>      | <i>SGSM1</i>          |
| <i>IPO9</i>       | <i>SGTB</i>           |
| <i>IQCB1</i>      | <i>SH3GL2</i>         |
| <i>IRGQ</i>       | <i>SH3PXD2B</i>       |
| <i>IRS2</i>       | <i>SHISA5</i>         |
| <i>ISLR</i>       | <i>SIMC1</i>          |
| <i>ITGA1</i>      | <i>SIRT1</i>          |
| <i>ITGB3</i>      | <i>SIX5</i>           |
| <i>ITGB8</i>      | <i>SLC25A36</i>       |
| <i>ITSN1</i>      | <i>SLC25A39</i>       |
| <i>JOSD1</i>      | <i>SLC25A51</i>       |
| <i>KATNAL1</i>    | <i>SLC26A2</i>        |
| <i>KATNBL1</i>    | <i>SLC27A4</i>        |
| <i>KCMF1</i>      | <i>SLC30A3</i>        |
| <i>KCNA6</i>      | <i>SLC30A5</i>        |
| <i>KCNC1</i>      | <i>SLC30A7</i>        |
| <i>KCNC2</i>      | <i>SLC33A1</i>        |

|                  |                |
|------------------|----------------|
| <i>KCNC3</i>     | <i>SLC35F5</i> |
| <i>KCNC4</i>     | <i>SLC39A1</i> |
| <i>KCNJ11</i>    | <i>SLC41A1</i> |
| <i>KCNJ3</i>     | <i>SLC4A1</i>  |
| <i>KCNJ6</i>     | <i>SLC4A8</i>  |
| <i>KCNK6</i>     | <i>SLC50A1</i> |
| <i>KCNQ4</i>     | <i>SLC6A1</i>  |
| <i>KCNV1</i>     | <i>SLC6A6</i>  |
| <i>KCTD10</i>    | <i>SLC7A2</i>  |
| <i>KCTD15</i>    | <i>SLC7A8</i>  |
| <i>KCTD16</i>    | <i>SLC8A1</i>  |
| <i>KCTD17</i>    | <i>SLC8A2</i>  |
| <i>KCTD21</i>    | <i>SLMO2</i>   |
| <i>KDM3A</i>     | <i>SMARCA2</i> |
| <i>KHNYN</i>     | <i>SMARCD1</i> |
| <i>KIAA0391</i>  | <i>SMC2</i>    |
| <i>KIAA0895L</i> | <i>SMIM14</i>  |
| <i>KIAA0930</i>  | <i>SMPD4</i>   |
| <i>KIAA1147</i>  | <i>SNRK</i>    |
| <i>KIAA1161</i>  | <i>SNX15</i>   |
| <i>KIAA1244</i>  | <i>SNX30</i>   |
| <i>KIAA1467</i>  | <i>SOBP</i>    |
| <i>KIAA1549</i>  | <i>SOCS2</i>   |
| <i>KIAA1919</i>  | <i>SOGA1</i>   |
| <i>KIAA1958</i>  | <i>SOGA3</i>   |
| <i>KIAA2022</i>  | <i>SORBS3</i>  |
| <i>KIF21B</i>    | <i>SOX4</i>    |
| <i>KIF2A</i>     | <i>SP1</i>     |
| <i>KLF8</i>      | <i>SP3</i>     |
| <i>KLF9</i>      | <i>SPOPL</i>   |
| <i>KLHDC8B</i>   | <i>SPRN</i>    |
| <i>KLHL13</i>    | <i>SPRY4</i>   |
| <i>KLHL23</i>    | <i>SPTBN1</i>  |
| <i>KLHL31</i>    | <i>SPTLC2</i>  |
| <i>KLHL36</i>    | <i>SPTSSA</i>  |
| <i>KLHL6</i>     | <i>SPTY2D1</i> |
| <i>CLK10</i>     | <i>SRGAP3</i>  |
| <i>KMT2D</i>     | <i>SRP19</i>   |
| <i>KMT2E</i>     | <i>SRPK1</i>   |
| <i>KPNA1</i>     | <i>SRSF10</i>  |
| <i>KPNA4</i>     | <i>ST8SIA3</i> |
| <i>KPNA5</i>     | <i>STARD13</i> |
| <i>KREMEN1</i>   | <i>STOM</i>    |
| <i>L2HGDH</i>    | <i>STX5</i>    |
| <i>LBH</i>       | <i>STXBP6</i>  |
| <i>LBR</i>       | <i>SUMO1</i>   |
| <i>LCOR</i>      | <i>SUPT16H</i> |
| <i>LCORL</i>     | <i>SV2A</i>    |
| <i>LDB1</i>      | <i>SVOP</i>    |



|                  |                  |
|------------------|------------------|
| <i>LEPROTL1</i>  | <i>SYAP1</i>     |
| <i>LGR4</i>      | <i>SYNPO2L</i>   |
| <i>LIMD1</i>     | <i>SYNRG</i>     |
| <i>LIMD2</i>     | <i>SYT1</i>      |
| <i>LIMK2</i>     | <i>SYT2</i>      |
| <i>LIN28A</i>    | <i>SYT9</i>      |
| <i>LIN28B</i>    | <i>TAGLN2</i>    |
| <i>LINGO1</i>    | <i>TAOK1</i>     |
| <i>LIPH</i>      | <i>TBL1X</i>     |
| <i>LIPT2</i>     | <i>TBPL1</i>     |
| <i>LMLN</i>      | <i>TCF7</i>      |
| <i>LMX1A</i>     | <i>TEAD1</i>     |
| <i>LONRF3</i>    | <i>TENM1</i>     |
| <i>LOR</i>       | <i>TET3</i>      |
| <i>LOXL4</i>     | <i>TFAP2D</i>    |
| <i>LPGAT1</i>    | <i>TFE3</i>      |
| <i>LPHN3</i>     | <i>TFG</i>       |
| <i>LRFN4</i>     | <i>TG</i>        |
| <i>LRIG2</i>     | <i>TGFB2</i>     |
| <i>LRIG3</i>     | <i>TGFBR1</i>    |
| <i>LRRC10B</i>   | <i>TGOLN2</i>    |
| <i>LRRC20</i>    | <i>THNSL1</i>    |
| <i>LRRC59</i>    | <i>THRAP3</i>    |
| <i>LRRC8B</i>    | <i>THUMPD3</i>   |
| <i>LSM11</i>     | <i>TIMM17A</i>   |
| <i>LTN1</i>      | <i>TK2</i>       |
| <i>LUC7L3</i>    | <i>TM9SF3</i>    |
| <i>LYVE1</i>     | <i>TMEM110</i>   |
| <i>LZIC</i>      | <i>TMEM158</i>   |
| <i>MAP3K1</i>    | <i>TMEM167A</i>  |
| <i>MAP3K13</i>   | <i>TMEM170B</i>  |
| <i>MAP3K2</i>    | <i>TMEM180</i>   |
| <i>MAP3K3</i>    | <i>TMEM200B</i>  |
| <i>MAP3K9</i>    | <i>TMEM33</i>    |
| <i>MAP4K3</i>    | <i>TMEM57</i>    |
| <i>MAP4K4</i>    | <i>TMEM87B</i>   |
| <i>MAPK1IP1L</i> | <i>TMOD3</i>     |
| <i>MAPK6</i>     | <i>TNFRSF10B</i> |
| <i>MAPK8</i>     | <i>TNIK</i>      |
| <i>MARCH9</i>    | <i>TNRC6B</i>    |
| <i>MARS2</i>     | <i>TOB2</i>      |
| <i>MBD2</i>      | <i>TOR2A</i>     |
| <i>MBTD1</i>     | <i>TPD52</i>     |
| <i>MBTPS2</i>    | <i>TPM4</i>      |
| <i>MDFI</i>      | <i>TRAF3</i>     |
| <i>MDM4</i>      | <i>TRAF3IP2</i>  |
| <i>MED28</i>     | <i>TRAM2</i>     |
| <i>MED6</i>      | <i>TRHDE</i>     |
| <i>MED8</i>      | <i>TRIM44</i>    |

|                |                         |
|----------------|-------------------------|
| <i>MEF2C</i>   | <i>TRIM55</i>           |
| <i>MEF2D</i>   | <i>TRIM56</i>           |
| <i>MEGF11</i>  | <i>TSPAN18</i>          |
| <i>MEIS1</i>   | <i>TTC31</i>            |
| <i>MEIS2</i>   | <i>TTPAL</i>            |
| <i>MESDC1</i>  | <i>TTYH3</i>            |
| <i>MEX3A</i>   | <i>TUBB1</i>            |
| <i>MFAP3L</i>  | <i>TXLNA</i>            |
| <i>MFSD4</i>   | <i>TYRO3</i>            |
| <i>MGA</i>     | <i>UBA2</i>             |
| <i>MGAT4A</i>  | <i>UBE2K</i>            |
| <i>MGLL</i>    | <i>UBE2Q1</i>           |
| <i>MIB1</i>    | <i>UBE2Z</i>            |
| <i>MICALCL</i> | <i>UBFD1</i>            |
| <i>MIEF1</i>   | <i>UBXN7</i>            |
| <i>MIOS</i>    | <i>UCK2</i>             |
| <i>MLLT10</i>  | <i>UNC13A</i>           |
| <i>MLXIP</i>   | <i>UNC80</i>            |
| <i>MMP11</i>   | <i>UNK</i>              |
| <i>MOB4</i>    | <i>UNKL</i>             |
| <i>MON2</i>    | <i>USH1G</i>            |
| <i>MPST</i>    | <i>USP32</i>            |
| <i>MRS2</i>    | <i>USP38</i>            |
| <i>MSANTD3</i> | <i>USP6</i>             |
| <i>MSI2</i>    | <i>VAMP2</i>            |
| <i>MSN</i>     | <i>VAMP3</i>            |
| <i>MTDH</i>    | <i>VAPB</i>             |
| <i>MTMR12</i>  | <i>VAT1</i>             |
| <i>MTMR3</i>   | <i>VEGFC</i>            |
| <i>MTUS1</i>   | <i>VKORC1</i>           |
| <i>MVB12B</i>  | <i>VPS13B</i>           |
| <i>MXD1</i>    | <i>VPS4B</i>            |
| <i>MYCBP</i>   | <i>VPS54</i>            |
| <i>MYCL</i>    | <i>VTI1B</i>            |
| <i>MYCN</i>    | <i>WASF2</i>            |
| <i>MYO1F</i>   | <i>WDR59</i>            |
| <i>MYO5B</i>   | <i>WDTC1</i>            |
| <i>MYRIP</i>   | <i>WIPF2</i>            |
| <i>NAA20</i>   | <i>WIPI2</i>            |
| <i>NAA30</i>   | <i>WNT4</i>             |
| <i>NAP1L1</i>  | <i>WTAP</i>             |
| <i>NAPEPLD</i> | <i>XPO1</i>             |
| <i>NAT8L</i>   | <i>XPO4</i>             |
| <i>NCOA1</i>   | <i>XXbac-BPG32J3.20</i> |
| <i>NCOR1</i>   | <i>XXYLT1</i>           |
| <i>NDST2</i>   | <i>YES1</i>             |
| <i>NEDD4L</i>  | <i>YIPF4</i>            |
| <i>NEFM</i>    | <i>YPEL2</i>            |
| <i>NEK3</i>    | <i>ZBTB10</i>           |

|                |                |
|----------------|----------------|
| <i>NEK9</i>    | <i>ZBTB14</i>  |
| <i>NGF</i>     | <i>ZBTB16</i>  |
| <i>NHLRC2</i>  | <i>ZBTB20</i>  |
| <i>NHLRC3</i>  | <i>ZBTB38</i>  |
| <i>NID2</i>    | <i>ZBTB4</i>   |
| <i>NIPA1</i>   | <i>ZBTB7B</i>  |
| <i>NIPAL4</i>  | <i>ZC3H11A</i> |
| <i>NKAP</i>    | <i>ZC3H14</i>  |
| <i>NKD1</i>    | <i>ZC3H7A</i>  |
| <i>NKIRAS2</i> | <i>ZC3HAV1</i> |
| <i>NLK</i>     | <i>ZHX1</i>    |
| <i>NLN</i>     | <i>ZHX3</i>    |
| <i>NME4</i>    | <i>ZIC3</i>    |
| <i>NME6</i>    | <i>ZNF131</i>  |
| <i>NNT</i>     | <i>ZNF217</i>  |
| <i>NOS1</i>    | <i>ZNF280C</i> |
| <i>NOVA1</i>   | <i>ZNF322</i>  |
| <i>NPEPL1</i>  | <i>ZNF354A</i> |
| <i>NR6A1</i>   | <i>ZNF354B</i> |
| <i>NRAS</i>    | <i>ZNF362</i>  |
| <i>NRK</i>     | <i>ZNF385A</i> |
| <i>NSD1</i>    | <i>ZNF395</i>  |
| <i>NSMCE2</i>  | <i>ZNF436</i>  |
| <i>NTN1</i>    | <i>ZNF664</i>  |
| <i>NUMBL</i>   | <i>ZNF710</i>  |
| <i>NUP155</i>  | <i>ZNF740</i>  |
| <i>NXT2</i>    | <i>ZNRF3</i>   |
| <i>NYNRIN</i>  |                |
| <i>OLR1</i>    |                |
| <i>ONECUT1</i> |                |
| <i>ONECUT2</i> |                |
| <i>ONECUT3</i> |                |
| <i>OSBPL3</i>  |                |
| <i>OSMR</i>    |                |
| <i>OSTF1</i>   |                |
| <i>OTOF</i>    |                |
| <i>OTUB2</i>   |                |
| <i>OTUD3</i>   |                |
| <i>P2RX1</i>   |                |
| <i>P4HA2</i>   |                |
| <i>PACS2</i>   |                |
| <i>PAG1</i>    |                |
| <i>PAK1</i>    |                |
| <i>PALD1</i>   |                |
| <i>PALM3</i>   |                |
| <i>PANX2</i>   |                |
| <i>PAPPA</i>   |                |
| <i>PARD6B</i>  |                |
| <i>PARM1</i>   |                |

*PARP8*  
*PAWR*  
*PAX2*  
*PAX3*  
*PBX1*  
*PBX2*  
*PBX3*  
*PCDH19*  
*PCDH20*  
*PCGF3*  
*PCTP*  
*PCYOX1*  
*PCYT1B*  
*PDE12*  
*PDGFB*  
*PDHB*  
*PDP2*  
*PDPR*  
*PDSS1*  
*PDZD8*  
*PEG10*  
*PEX11B*  
*PGM2L1*  
*PGRMC1*  
*PHACTR2*  
*PHF8*  
*PI4K2B*  
*PIAS4*  
*PIGA*  
*PIGU*  
*PIK3CA*  
*PIK3IP1*  
*PITPNM3*  
*PKIA*  
*PKN2*  
*PLA2G15*  
*PLA2G3*  
*PLAGL2*  
*PLCXD3*  
*PLD3*  
*PLD5*  
*PLEKHA3*  
*PLEKHA8*  
*PLEKHG7*  
*PLEKHH1*  
*PLEKHO1*  
*PLXNA2*  
*PLXNA4*  
*PLXNC1*

PLXND1  
PMAIP1  
POC1B-GALNT4  
POGLUT1  
POGZ  
POLR2D  
POLR3D  
POTEE  
POTEG  
POTEM  
POU2F1  
POU6F2  
PPAPDC2  
PPARGC1A  
PPARGC1B  
PPP1R12B  
PPP1R15B  
PPP1R16B  
PPP2R2A  
PPP3CA  
PPTC7  
PQLC2  
PRDM1  
PRDM5  
PRKAA2  
PRKAB2  
PRKAR2A  
PRLR  
PRPF38B  
PRR14L  
PRR18  
PRRX1  
PRSS22  
PSENE1  
PSORS1C2  
PTAFR  
PTAR1  
PTPRD  
PTPRU  
PURB  
PXDN  
PXMP4  
PXT1  
PYGO2  
QARS  
RAB11FIP4  
RAB15  
RAB22A  
RAB30

*RAB3GAP2*  
*RAB40C*  
*RAB8B*  
*RADIL*  
*RAG1*  
*RALB*  
*RALGPS1*  
*RANBP2*  
*RASGRP1*  
*RASL10A*  
*RASL10B*  
*RAVER2*  
*RB1*  
*RBFOX1*  
*RBFOX2*  
*RBM38*  
*RBMS1*  
*RBMS2*  
*RBPJ*  
*RCN1*  
*RCSD1*  
*RDH10*  
*RDX*  
*REEP1*  
*REL*  
*RFX6*  
*RGAG1*  
*RGMA*  
*RGS16*  
*RGS17*  
*RICTOR*  
*RIMKLA*  
*RIMS3*  
*RIOK3*  
*RNF152*  
*RNF165*  
*RNF170*  
*RNF20*  
*RNF217*  
*RNF38*  
*RNF44*  
*RNF7*  
*RNFT1*  
*ROBO1*  
*RORC*  
*RP1-170O19.20*  
*RP11-480I12.4*  
*RP11-766F14.2*  
*RPS6KA3*

*RPUSD2*  
*RRAGD*  
*RRM2*  
*RRP1B*  
*RSF1*  
*RSPO2*  
*RTCA*  
*RUFY3*  
*RUNX1T1*  
*S100A8*  
*SALL3*  
*SALL4*  
*SAMD12*  
*SAP30L*  
*SBK1*  
*SBNO1*  
*SCARA3*  
*SCD*  
*SCN11A*  
*SCN4B*  
*SCN5A*  
*SCN8A*  
*SCRT2*  
*SCUBE3*  
*SCYL3*  
*SDK1*  
*SEC14L1*  
*SEC14L5*  
*SEC16B*  
*SEC31B*  
*SECISBP2L*  
*SEMA4C*  
*SEMA4F*  
*SEMA4G*  
*SENP2*  
*SENP5*  
*SESN3*  
*SESTD1*  
*SFMBT1*  
*SFT2D3*  
*SH2B3*  
*SH3RF3*  
*SKIDA1*  
*SKIL*  
*SLC10A6*  
*SLC10A7*  
*SLC12A9*  
*SLC16A10*  
*SLC16A14*

*SLC16A9*  
*SLC1A4*  
*SLC20A1*  
*SLC22A23*  
*SLC25A18*  
*SLC25A24*  
*SLC25A27*  
*SLC25A32*  
*SLC25A4*  
*SLC26A9*  
*SLC2A12*  
*SLC30A1*  
*SLC30A4*  
*SLC30A6*  
*SLC30A7*  
*SLC31A1*  
*SLC35D2*  
*SLC38A9*  
*SLC45A4*  
*SLC4A4*  
*SLC52A3*  
*SLC5A6*  
*SLC5A9*  
*SLC6A1*  
*SLC6A15*  
*SLC6A5*  
*SLC7A14*  
*SLC8A2*  
*SLC9A9*  
*SLCO5A1*  
*SLK*  
*SMAD2*  
*SMARCAD1*  
*SMARCC1*  
*SMC1A*  
*SMCR8*  
*SMIM13*  
*SMIM3*  
*SMUG1*  
*SNAP23*  
*SNN*  
*SNX1*  
*SNX16*  
*SNX17*  
*SNX30*  
*SNX6*  
*SOCS1*  
*SOCS4*  
*SOCS7*



SOST  
SOWAHA  
SOX13  
SOX6  
SP8  
SPATA13  
SPATA2  
SPEG  
SPIRE1  
SPOCD1  
SPRED3  
SPRYD4  
SPTBN4  
SRD5A3  
SREBF2  
SREK1  
SREK1IP1  
SRGAP1  
SRGAP3  
SSH1  
ST3GAL1  
ST8SIA1  
STAB2  
STARD13  
STARD3NL  
STARD9  
STAT3  
STEAP3  
STK24  
STK40  
STOX2  
STRBP  
STRN  
STX17  
STX3  
STXBP5  
STYX  
SUB1  
SUCLG2  
SULF1  
SULF2  
SURF4  
SUV39H2  
SWT1  
SYNCRIP  
SYNJ2BP  
SYT1  
SYT11  
SYT2

SYT7  
TAB2  
TAF9B  
TAOK1  
TARBP2  
TBKBP1  
TBX5  
TEAD3  
TECPR2  
TENM2  
TET2  
TET3  
TEX261  
TFR2  
TGDS  
TGFB1  
TGFB3  
THAP9  
THBS1  
THOC2  
THRA  
THRSP  
TIA1  
TIMM17B  
TMC7  
TMED5  
TMEM110  
TMEM135  
TMEM143  
TMEM167A  
TMEM178B  
TMEM194A  
TMEM2  
TMEM233  
TMEM234  
TMEM251  
TMEM255A  
TMEM26  
TMEM41A  
TMEM65  
TMOD2  
TMPPE  
TMPRSS2  
TMTC3  
TMX4  
TNFAIP3  
TNFRSF1B  
TNFSF9  
TNIK

TOB2  
TOR1AIP2  
TP53  
TPP1  
TRABD  
TRANK1  
TRHDE  
TRIB1  
TRIB2  
TRIM41  
TRIM67  
TRIM71  
TRIOBP  
TRPM6  
TSC1  
TSC22D2  
TSPAN18  
TSPAN2  
TSPEAR  
TSPYL5  
TTC31  
TTC39C  
TTL  
TTLL4  
TUSC2  
TXLNA  
TXLNG  
UBE2G2  
UBN2  
UFM1  
UGCG  
UGGT1  
UHRF2  
ULK2  
UNC5A  
USP12  
USP21  
USP24  
USP32  
USP38  
USP44  
USP47  
USP49  
USP6  
UTP15  
UTRN  
VANGL2  
VASH2  
VAV3

VCPIP1  
VEZT  
VGLL3  
VPS26B  
VSNL1  
VSTM5  
WAPAL  
WARS2  
WASL  
WDFY2  
WDFY4  
WDR37  
WIPI2  
WNK3  
WNT1  
WNT9A  
WNT9B  
XK  
XKR4  
XKR7  
XKR8  
XKRX  
XPOT  
XRN1  
XYLT1  
YAF2  
YBX2  
YOD1  
YPEL2  
YTHDF3  
YY1  
ZBTB10  
ZBTB16  
ZBTB26  
ZBTB37  
ZBTB39  
ZBTB5  
ZBTB8B  
ZC3H10  
ZC3H3  
ZC3HAV1L  
ZCCHC11  
ZCCHC3  
ZFYVE26  
ZKSCAN5  
ZNF10  
ZNF200  
ZNF202  
ZNF24

ZNF275  
ZNF280B  
ZNF282  
ZNF322  
ZNF341  
ZNF354A  
ZNF354B  
ZNF362  
ZNF391  
ZNF451  
ZNF462  
ZNF473  
ZNF512B  
ZNF516  
ZNF566  
ZNF583  
ZNF620  
ZNF641  
ZNF644  
ZNF652  
ZNF689  
ZNF697  
ZNF70  
ZNF710  
ZNF74  
ZNF740  
ZNF774  
ZNF783  
ZNF784  
ZNF879  
ZPLD1  
ZSWIM4  
ZSWIM5

Table S11. Balance diagnostics before and after inverse propensity score weighting

|                         | Absolute weighted standardized difference (%) |                                      |                           |                                   |
|-------------------------|-----------------------------------------------|--------------------------------------|---------------------------|-----------------------------------|
|                         | Means                                         | Higher order moments*                | Interactions <sup>†</sup> | Kolmogorov smirnov test statistic |
| <b>Model A</b>          |                                               |                                      |                           |                                   |
| Before weighting        | 32% - 72%                                     | 33% - 66%                            | 23% - 86%                 | 0.23 - 0.42                       |
| After weighting         | 4% - 27%                                      | 0.2% - 15%,<br>except 30%<br>for Age | 0.7% - 28%                | 0.13 - 0.31                       |
| Improvement in balance? | Yes                                           | Yes                                  | Yes                       | Yes                               |
| <b>Model B</b>          |                                               |                                      |                           |                                   |
| Before weighting        | 11% - 70%                                     | 9% - 59%                             | 21% - 76%                 | 0.13 - 0.39                       |
| After weighting         | 0.1% - 12%,<br>except 24% for<br>Age          | 0.1% - 8%,<br>except 26%<br>for Age  | 0.2% - 21%                | 0.14 - 0.30                       |
| Improvement in balance? | Yes                                           | Yes                                  | Yes                       | Yes                               |

Model A, IS and SS; Model B, IS+ and SS+.

\*Only second order moments (squares) assessed.

<sup>†</sup>Only two-way interactions assessed.

## Supplemental Figures

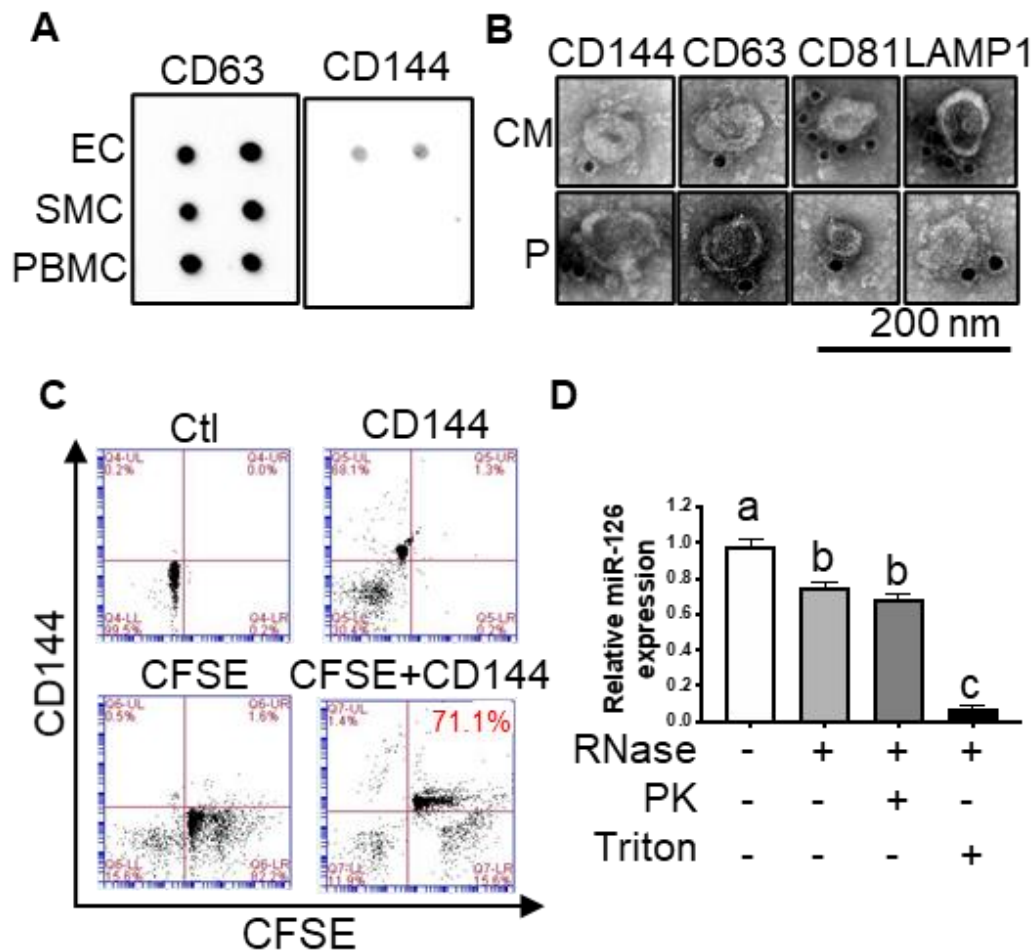

**Figure S1. Characterizations of EC-EVs.** **A**, Dot blot immunostaining of CD63 and CD144 in EVs collected from conditioned media of endothelial cells (EC), smooth muscle cells (SMC), and peripheral blood mononuclear cells (PBMC). N=2 replicates each, equal protein loading per spot. **B**, Immunogold staining of EVs from EC-conditioned media (CM) and human plasma (P) with EV-specific markers (CD81, CD63, and LAMP1) and EC-surface marker (CD144) on EC-EVs. **C**, Flow cytometry shows the presence of CD63<sup>+</sup>CD144<sup>+</sup> EVs in human plasma samples using magnetic beads conjugated with anti-CD63 antibody and co-stained with anti-CD144 antibody. CFSE dye was used to labeled lipid-based EVs. **D**, Protection assay demonstrates the ability of EC-EVs isolated from EC conditioned media to protect miR-126. Expressional levels of miR-126 in each group was normalized to Mock. Ctl: beads incubated with plasma without stains; PK: protein kinase.

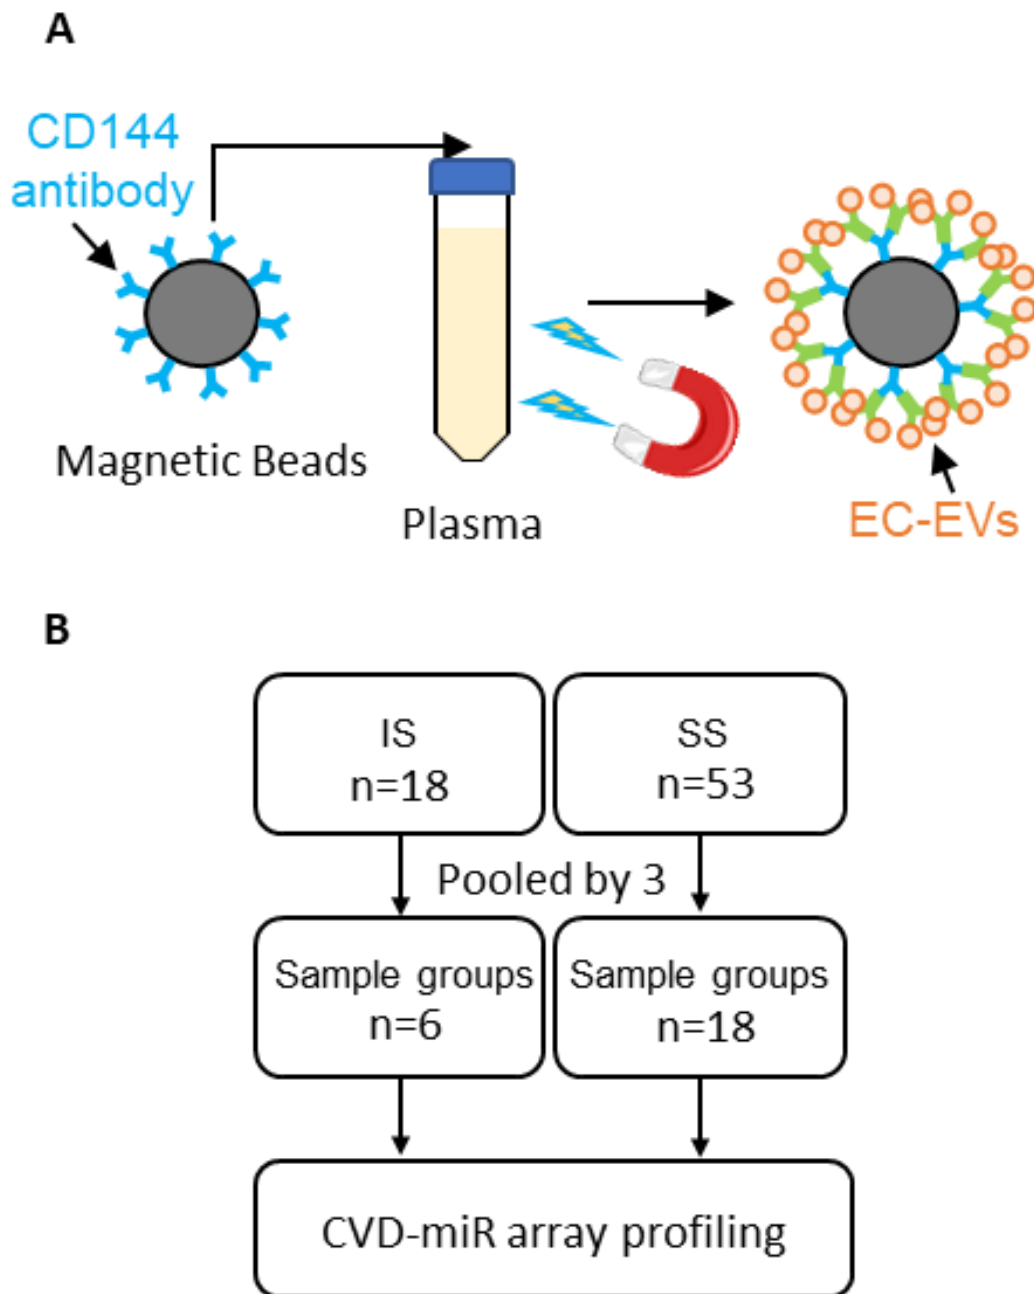

**Figure S2. Strategy of cardiovascular disease (CVD)-related miR profiling from IS and SS groups.** **A**, Schematic protocol of EC-EV immunoprecipitation from plasma. **B**, Schematic protocol of EC-EV miR analysis and CVD-miR profiling (Human Cardiovascular Disease Array, Qiagen) using pooled RNA samples from IS and SS groups.



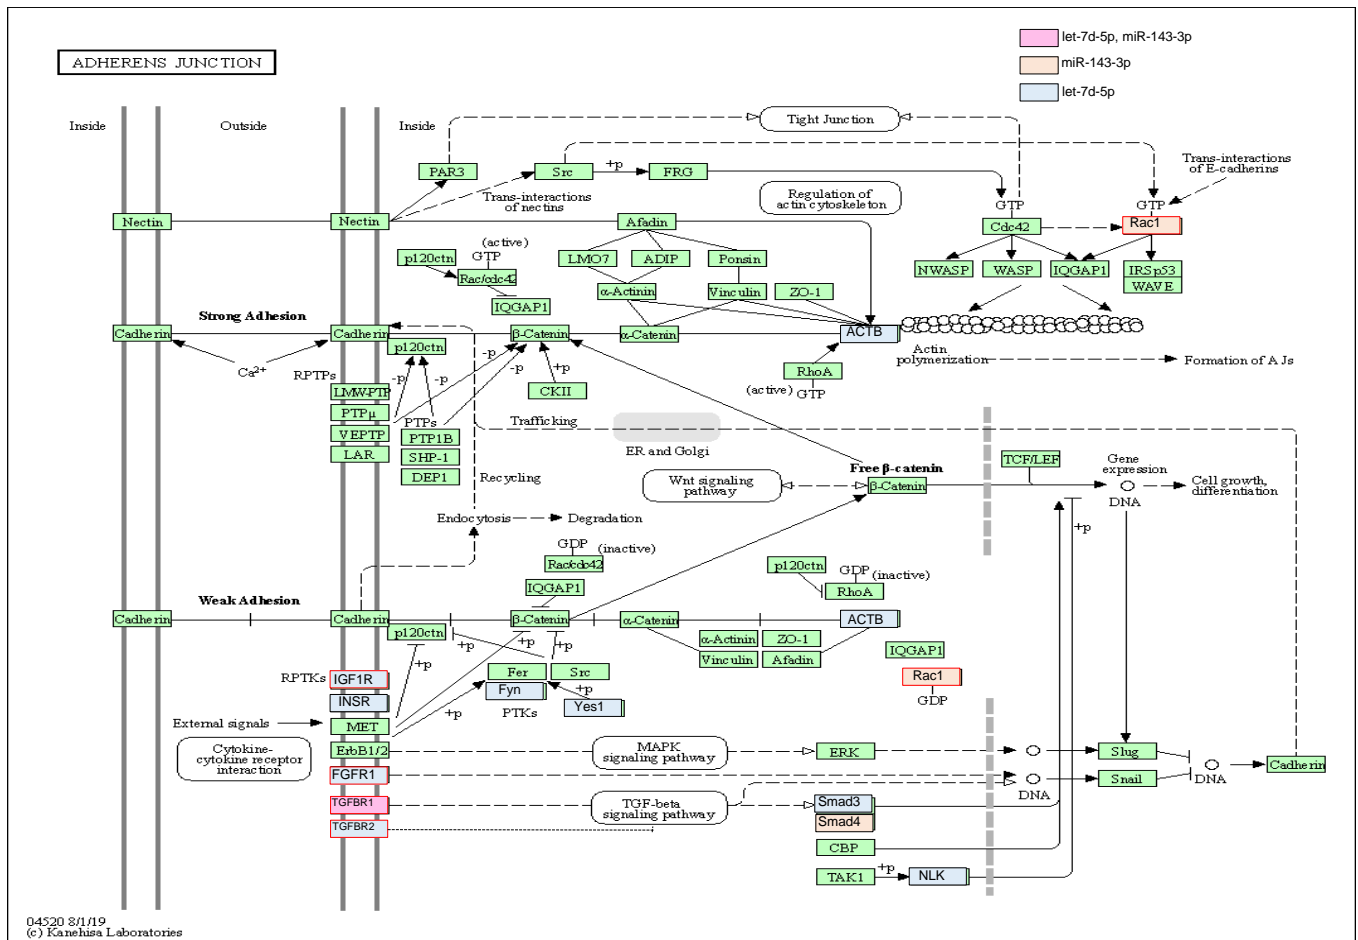

**Figure S3. Molecular map of KEGG adherens junction pathway highlighting sitting time-associated miR target genes.** Adherens junction pathway components targeted by let-7d-5p or/and miR-143-3p are color-coded (see legend). Red outline indicates components that are direct targets of let-7d-5p and/or miR-143-3p, black outline indicates components that are indirect targets. KEGG pathway image (map04520) is used with permission from KEGG.<sup>1</sup>

<sup>1</sup> Kanehisa M, Sato Y, Kawashima M, Furumichi M, Tanabe M. KEGG as a reference resource for gene and protein annotation. *Nucleic Acids Res.* 2016 Jan 4;44(D1):D457-62. doi: 10.1093/nar/gkv1070.
